# Supplementary material
Source: publisher figshare collection journal article supplement (https://acs.figshare.com/ndownloader/files/4186213)
Supplement: Supplementary file 1 [file 4186213]

 

data_C1

 

_audit_creation_method            SHELXL-97

_chemical_name_systematic

;

 ?

;

_chemical_name_common             ?

_chemical_melting_point           ?

_chemical_formula_moiety          ?

_chemical_formula_sum

 'C41 H39 Cu Gd N15 O11 W'

_chemical_formula_weight          1322.51

 

loop_

 _atom_type_symbol

 _atom_type_description

 _atom_type_scat_dispersion_real

 _atom_type_scat_dispersion_imag

 _atom_type_scat_source

 'C'  'C'   0.0033   0.0016

 'International Tables Vol C Tables 4.2.6.8 and 6.1.1.4'

 'H'  'H'   0.0000   0.0000

 'International Tables Vol C Tables 4.2.6.8 and 6.1.1.4'

 'Cu'  'Cu'   0.3201   1.2651

 'International Tables Vol C Tables 4.2.6.8 and 6.1.1.4'

 'Gd'  'Gd'  -0.1653   3.9035

 'International Tables Vol C Tables 4.2.6.8 and 6.1.1.4'

 'N'  'N'   0.0061   0.0033

 'International Tables Vol C Tables 4.2.6.8 and 6.1.1.4'

 'O'  'O'   0.0106   0.0060

 'International Tables Vol C Tables 4.2.6.8 and 6.1.1.4'

 'W'  'W'  -0.8490   6.8722

 'International Tables Vol C Tables 4.2.6.8 and 6.1.1.4'

 

_symmetry_cell_setting            Triclinic

_symmetry_space_group_name_H-M    P-1

 

loop_

 _symmetry_equiv_pos_as_xyz

 'x, y, z'

 '-x, -y, -z'

 

_cell_length_a                    11.8987(7)

_cell_length_b                    14.0586(8)

_cell_length_c                    14.8624(10)

_cell_angle_alpha                 79.128(5)

_cell_angle_beta                  82.015(5)

_cell_angle_gamma                 85.498(5)

_cell_volume                      2414.4(3)

_cell_formula_units_Z             2

_cell_measurement_temperature     293(2)

_cell_measurement_reflns_used     38109

_cell_measurement_theta_min       2.35

_cell_measurement_theta_max       30.41

 

_exptl_crystal_description        prism

_exptl_crystal_colour             brown

_exptl_crystal_size_max           0.4

_exptl_crystal_size_mid           0.2

_exptl_crystal_size_min           0.1

_exptl_crystal_density_meas       'not measured'

_exptl_crystal_density_diffrn     1.819

_exptl_crystal_density_method     'not measured'

_exptl_crystal_F_000              1290

_exptl_absorpt_coefficient_mu     4.244

_exptl_absorpt_correction_type    multi-scan

_exptl_absorpt_correction_T_min   0.2867

_exptl_absorpt_correction_T_max   0.6178

_exptl_absorpt_process_details

;

[c.f. r.h. blessing, acta cryst. (1995), a51, 33-38]

;

_exptl_special_details

;

 ?

;

 

_diffrn_ambient_temperature       293(2)

_diffrn_radiation_wavelength      0.71073

_diffrn_radiation_type            MoK\a

_diffrn_radiation_source          'fine-focus sealed tube'

_diffrn_radiation_monochromator   graphite

_diffrn_measurement_device_type   'STOE IPDS II'

_diffrn_measurement_method        'omega scans'

_diffrn_detector_area_resol_mean  ?

_diffrn_standards_number          ?

_diffrn_standards_interval_count  ?

_diffrn_standards_interval_time   ?

_diffrn_standards_decay_%         ?

_diffrn_reflns_number             42537

_diffrn_reflns_av_R_equivalents   0.0742

_diffrn_reflns_av_sigmaI/netI     0.0724

_diffrn_reflns_limit_h_min        -16

_diffrn_reflns_limit_h_max        16

_diffrn_reflns_limit_k_min        -20

_diffrn_reflns_limit_k_max        20

_diffrn_reflns_limit_l_min        -21

_diffrn_reflns_limit_l_max        21

_diffrn_reflns_theta_min          2.35

_diffrn_reflns_theta_max          30.41

_reflns_number_total              14441

_reflns_number_gt                 10600

_reflns_threshold_expression      >2sigma(I)

 

_computing_data_collection        'X-Area'

_computing_cell_refinement        'X-Area'

_computing_data_reduction         'X-Area'

_computing_structure_solution     'SHELXS-97 (Sheldrick, 1997)'

_computing_structure_refinement   'SHELXL-97 (Sheldrick, 1997)'

_computing_molecular_graphics     ?

_computing_publication_material   ?

 

_refine_special_details

;

 Refinement of F^2^ against ALL reflections.  The weighted R-factor wR and

 goodness of fit S are based on F^2^, conventional R-factors R are based

 on F, with F set to zero for negative F^2^. The threshold expression of

 F^2^ > 2sigma(F^2^) is used only for calculating R-factors(gt) etc. and is

 not relevant to the choice of reflections for refinement.  R-factors based

 on F^2^ are statistically about twice as large as those based on F, and R-

 factors based on ALL data will be even larger.

;

 

_refine_ls_structure_factor_coef  Fsqd

_refine_ls_matrix_type            full

_refine_ls_weighting_scheme       calc

_refine_ls_weighting_details

 'calc w=1/[\s^2^(Fo^2^)+(0.0449P)^2^+15.3393P] where P=(Fo^2^+2Fc^2^)/3'

_atom_sites_solution_primary      direct

_atom_sites_solution_secondary    difmap

_atom_sites_solution_hydrogens    geom

_refine_ls_hydrogen_treatment     constr

_refine_ls_extinction_method      none

_refine_ls_extinction_coef        ?

_refine_ls_number_reflns          14441

_refine_ls_number_parameters      634

_refine_ls_number_restraints      0

_refine_ls_R_factor_all           0.0936

_refine_ls_R_factor_gt            0.0616

_refine_ls_wR_factor_ref          0.1372

_refine_ls_wR_factor_gt           0.1252

_refine_ls_goodness_of_fit_ref    1.082

_refine_ls_restrained_S_all       1.082

_refine_ls_shift/su_max           0.001

_refine_ls_shift/su_mean          0.000

 

loop_

 _atom_site_label

 _atom_site_type_symbol

 _atom_site_fract_x

 _atom_site_fract_y

 _atom_site_fract_z

 _atom_site_U_iso_or_equiv

 _atom_site_adp_type

 _atom_site_occupancy

 _atom_site_symmetry_multiplicity

 _atom_site_calc_flag

 _atom_site_refinement_flags

 _atom_site_disorder_assembly

 _atom_site_disorder_group

C1 C 0.1470(8) -0.1460(7) 0.8411(8) 0.050(2) Uani 1 1 d . . .

H1A H 0.0853 -0.1023 0.8217 0.075 Uiso 1 1 calc R . .

H1B H 0.1266 -0.1783 0.9036 0.075 Uiso 1 1 calc R . .

H1C H 0.1627 -0.1933 0.8015 0.075 Uiso 1 1 calc R . .

C2 C 0.3455(7) -0.1465(6) 0.8603(5) 0.0337(16) Uani 1 1 d . . .

C3 C 0.3526(8) -0.2446(6) 0.8875(7) 0.046(2) Uani 1 1 d . . .

H3 H 0.2889 -0.2801 0.8910 0.056 Uiso 1 1 calc R . .

C4 C 0.4548(9) -0.2918(6) 0.9099(7) 0.052(2) Uani 1 1 d . . .

H4 H 0.4600 -0.3590 0.9272 0.063 Uiso 1 1 calc R . .

C5 C 0.5474(9) -0.2395(7) 0.9066(7) 0.048(2) Uani 1 1 d . . .

H5 H 0.6154 -0.2710 0.9225 0.057 Uiso 1 1 calc R . .

C6 C 0.5406(7) -0.1372(6) 0.8789(6) 0.0364(17) Uani 1 1 d . . .

C7 C 0.4387(7) -0.0900(6) 0.8564(5) 0.0319(15) Uani 1 1 d . . .

C8 C 0.6435(7) -0.0871(7) 0.8731(6) 0.042(2) Uani 1 1 d . . .

H8 H 0.7075 -0.1256 0.8889 0.051 Uiso 1 1 calc R . .

C9 C 0.7745(7) 0.0352(7) 0.8430(7) 0.046(2) Uani 1 1 d . . .

H9A H 0.8023 0.0608 0.7792 0.055 Uiso 1 1 calc R . .

H9B H 0.8234 -0.0207 0.8640 0.055 Uiso 1 1 calc R . .

C10 C 0.7795(7) 0.1122(7) 0.9016(7) 0.046(2) Uani 1 1 d . . .

H10A H 0.7357 0.0926 0.9615 0.055 Uiso 1 1 calc R . .

H10B H 0.8577 0.1165 0.9114 0.055 Uiso 1 1 calc R . .

C11 C 0.7343(7) 0.2108(7) 0.8581(7) 0.046(2) Uani 1 1 d . . .

H11A H 0.7483 0.2579 0.8948 0.056 Uiso 1 1 calc R . .

H11B H 0.7760 0.2289 0.7970 0.056 Uiso 1 1 calc R . .

C12 C 0.5597(7) 0.2965(6) 0.8590(6) 0.0374(17) Uani 1 1 d . . .

H12 H 0.6025 0.3410 0.8764 0.045 Uiso 1 1 calc R . .

C13 C 0.4440(7) 0.3295(6) 0.8467(5) 0.0329(16) Uani 1 1 d . . .

C14 C 0.4071(9) 0.4238(7) 0.8646(7) 0.047(2) Uani 1 1 d . . .

H14 H 0.4553 0.4604 0.8869 0.056 Uiso 1 1 calc R . .

C15 C 0.2993(9) 0.4603(7) 0.8485(8) 0.053(3) Uani 1 1 d . . .

H15 H 0.2744 0.5213 0.8614 0.064 Uiso 1 1 calc R . .

C16 C 0.2272(7) 0.4073(6) 0.8132(7) 0.042(2) Uani 1 1 d . . .

H16 H 0.1560 0.4339 0.8001 0.050 Uiso 1 1 calc R . .

C17 C 0.2612(6) 0.3171(6) 0.7980(5) 0.0319(15) Uani 1 1 d . . .

C18 C 0.3711(6) 0.2750(5) 0.8130(5) 0.0294(14) Uani 1 1 d . . .

C19 C 0.0861(8) 0.2959(8) 0.7394(8) 0.056(3) Uani 1 1 d . . .

H19A H 0.0497 0.2483 0.7167 0.084 Uiso 1 1 calc R . .

H19B H 0.0946 0.3531 0.6927 0.084 Uiso 1 1 calc R . .

H19C H 0.0406 0.3121 0.7935 0.084 Uiso 1 1 calc R . .

C20 C 0.5763(7) 0.2110(6) 0.4076(6) 0.0356(17) Uani 1 1 d . . .

H20 H 0.6080 0.1514 0.4339 0.043 Uiso 1 1 calc R . .

C21 C 0.4891(7) 0.2126(7) 0.3546(6) 0.0401(19) Uani 1 1 d . . .

H21 H 0.4633 0.1550 0.3449 0.048 Uiso 1 1 calc R . .

C22 C 0.4405(7) 0.3015(8) 0.3160(6) 0.043(2) Uani 1 1 d . . .

H22 H 0.3826 0.3043 0.2794 0.052 Uiso 1 1 calc R . .

C23 C 0.4795(7) 0.3850(6) 0.3328(6) 0.0373(18) Uani 1 1 d . . .

H23 H 0.4467 0.4450 0.3087 0.045 Uiso 1 1 calc R . .

C24 C 0.5685(6) 0.3800(5) 0.3861(5) 0.0277(14) Uani 1 1 d . . .

C25 C 0.6131(6) 0.4657(6) 0.4063(5) 0.0306(15) Uani 1 1 d . . .

C26 C 0.5643(7) 0.5573(6) 0.3862(6) 0.0365(17) Uani 1 1 d . . .

H26 H 0.4994 0.5675 0.3565 0.044 Uiso 1 1 calc R . .

C27 C 0.6111(8) 0.6351(6) 0.4097(6) 0.0403(19) Uani 1 1 d . . .

H27 H 0.5775 0.6973 0.3972 0.048 Uiso 1 1 calc R . .

C28 C 0.7089(8) 0.6180(6) 0.4521(6) 0.042(2) Uani 1 1 d . . .

H28 H 0.7433 0.6691 0.4671 0.050 Uiso 1 1 calc R . .

C29 C 0.7547(7) 0.5248(6) 0.4717(6) 0.0357(17) Uani 1 1 d . . .

H29 H 0.8208 0.5138 0.4998 0.043 Uiso 1 1 calc R . .

C30 C 0.6619(6) 0.1967(6) 0.5915(6) 0.0325(16) Uani 1 1 d . . .

C31 C 0.8720(7) 0.2065(6) 0.5865(6) 0.0362(17) Uani 1 1 d . . .

C32 C 0.8186(7) 0.1609(5) 0.4432(6) 0.0319(15) Uani 1 1 d . . .

C33 C 0.9304(6) 0.3568(6) 0.4815(7) 0.0384(18) Uani 1 1 d . . .

C34 C 0.8306(7) 0.3303(6) 0.3459(5) 0.0329(16) Uani 1 1 d . . .

C35 C 0.7337(7) 0.3543(6) 0.6154(6) 0.0335(16) Uani 1 1 d . . .

C36 C 0.7611(11) 0.5275(9) 0.8230(11) 0.069(3) Uani 1 1 d . . .

C37 C 0.8657(12) 0.5313(12) 0.7600(11) 0.091(5) Uani 1 1 d . . .

H37A H 0.8680 0.4820 0.7229 0.137 Uiso 1 1 calc R . .

H37B H 0.9293 0.5205 0.7947 0.137 Uiso 1 1 calc R . .

H37C H 0.8692 0.5939 0.7207 0.137 Uiso 1 1 calc R . .

C38 C 0.9888(16) 0.3562(12) 1.0016(11) 0.090(5) Uani 1 1 d . . .

C39 C 1.0803(17) 0.3364(15) 1.0595(12) 0.119(7) Uani 1 1 d . . .

H39A H 1.1519 0.3321 1.0213 0.179 Uiso 1 1 calc R . .

H39B H 1.0690 0.2761 1.1016 0.179 Uiso 1 1 calc R . .

H39C H 1.0803 0.3878 1.0938 0.179 Uiso 1 1 calc R . .

C40 C 0.8414(14) 0.8384(14) 0.6725(14) 0.097(5) Uani 1 1 d . . .

C41 C 0.8565(17) 0.895(2) 0.5859(16) 0.190(15) Uani 1 1 d . . .

H41A H 0.7896 0.9370 0.5764 0.285 Uiso 1 1 calc R . .

H41B H 0.8697 0.8548 0.5399 0.285 Uiso 1 1 calc R . .

H41C H 0.9207 0.9343 0.5811 0.285 Uiso 1 1 calc R . .

Cu1 Cu 0.53650(8) 0.10555(7) 0.82076(7) 0.0323(2) Uani 1 1 d . . .

N1 N 0.6573(5) 0.0048(6) 0.8486(5) 0.0383(16) Uani 1 1 d . . .

N2 N 0.6122(6) 0.2155(5) 0.8498(5) 0.0364(15) Uani 1 1 d . . .

N3 N 0.3593(6) 0.0664(6) 0.5873(6) 0.0436(17) Uani 1 1 d . . .

N4 N 0.1146(7) 0.0995(6) 0.9404(6) 0.0471(19) Uani 1 1 d . . .

N5 N 0.6165(5) 0.2923(4) 0.4224(4) 0.0253(12) Uani 1 1 d . . .

N6 N 0.7075(5) 0.4492(4) 0.4517(4) 0.0271(12) Uani 1 1 d . . .

N7 N 0.6063(6) 0.1462(6) 0.6495(5) 0.0418(16) Uani 1 1 d . . .

N8 N 0.9272(6) 0.1580(6) 0.6376(6) 0.0451(18) Uani 1 1 d . . .

N9 N 0.8482(7) 0.0917(6) 0.4163(6) 0.0487(19) Uani 1 1 d . . .

N10 N 1.0184(7) 0.3859(7) 0.4757(7) 0.059(2) Uani 1 1 d . . .

N11 N 0.8603(7) 0.3519(7) 0.2684(6) 0.053(2) Uani 1 1 d . . .

N12 N 0.7086(8) 0.3918(6) 0.6786(5) 0.050(2) Uani 1 1 d . . .

N13 N 0.6770(10) 0.5309(9) 0.8703(10) 0.088(4) Uani 1 1 d . . .

N14 N 0.9255(17) 0.3660(16) 0.9536(14) 0.155(8) Uani 1 1 d . . .

N15 N 0.8255(18) 0.7914(13) 0.7428(15) 0.148(7) Uani 1 1 d . . .

O1 O 0.2471(5) -0.0921(4) 0.8361(4) 0.0400(13) Uani 1 1 d . . .

O2 O 0.4260(5) 0.0058(4) 0.8300(4) 0.0362(12) Uani 1 1 d . . .

O3 O 0.3985(4) 0.1868(4) 0.7953(4) 0.0332(12) Uani 1 1 d . . .

O4 O 0.1968(5) 0.2571(4) 0.7624(4) 0.0377(13) Uani 1 1 d . . .

O5 O 0.3571(5) -0.0050(4) 0.6538(5) 0.0435(14) Uani 1 1 d . . .

O6 O 0.3285(6) 0.1496(5) 0.6098(5) 0.0503(16) Uani 1 1 d . . .

O7 O 0.3849(8) 0.0563(7) 0.5084(5) 0.070(2) Uani 1 1 d . . .

O8 O 0.0794(5) 0.0846(5) 0.8686(5) 0.0471(15) Uani 1 1 d . . .

O9 O 0.2197(6) 0.1019(5) 0.9361(5) 0.0462(15) Uani 1 1 d . . .

O10 O 0.0511(7) 0.1112(7) 1.0093(5) 0.075(3) Uani 1 1 d . . .

O11 O 0.1181(5) 0.0520(5) 0.6890(5) 0.0443(15) Uani 1 1 d . . .

Gd1 Gd 0.26398(3) 0.08263(3) 0.77305(3) 0.02783(9) Uani 1 1 d . . .

W1 W 0.76972(2) 0.29500(2) 0.49158(2) 0.02353(7) Uani 1 1 d . . .

 

loop_

 _atom_site_aniso_label

 _atom_site_aniso_U_11

 _atom_site_aniso_U_22

 _atom_site_aniso_U_33

 _atom_site_aniso_U_23

 _atom_site_aniso_U_13

 _atom_site_aniso_U_12

C1 0.040(5) 0.040(5) 0.069(7) -0.007(4) -0.004(4) -0.008(4)

C2 0.040(4) 0.027(4) 0.031(4) -0.002(3) -0.002(3) 0.001(3)

C3 0.050(5) 0.030(4) 0.055(6) -0.003(4) -0.002(4) 0.000(4)

C4 0.071(7) 0.024(4) 0.056(6) 0.003(4) -0.009(5) 0.006(4)

C5 0.060(6) 0.033(4) 0.045(5) -0.002(4) -0.009(4) 0.015(4)

C6 0.036(4) 0.038(4) 0.032(4) 0.000(3) -0.006(3) 0.006(3)

C7 0.037(4) 0.026(4) 0.030(4) -0.002(3) -0.004(3) 0.003(3)

C8 0.034(4) 0.052(5) 0.038(5) -0.002(4) -0.011(3) 0.017(4)

C9 0.031(4) 0.045(5) 0.058(6) -0.004(4) -0.006(4) 0.007(4)

C10 0.028(4) 0.062(6) 0.049(5) -0.006(4) -0.018(4) 0.003(4)

C11 0.033(4) 0.047(5) 0.064(6) -0.009(4) -0.017(4) -0.006(4)

C12 0.040(4) 0.035(4) 0.039(4) -0.005(3) -0.010(3) -0.007(3)

C13 0.036(4) 0.032(4) 0.034(4) -0.008(3) -0.008(3) -0.004(3)

C14 0.056(6) 0.037(5) 0.056(6) -0.019(4) -0.019(4) -0.001(4)

C15 0.053(6) 0.036(5) 0.079(7) -0.028(5) -0.016(5) 0.007(4)

C16 0.038(4) 0.029(4) 0.062(6) -0.018(4) -0.010(4) 0.007(3)

C17 0.030(4) 0.031(4) 0.034(4) -0.007(3) -0.002(3) 0.001(3)

C18 0.029(3) 0.028(4) 0.032(4) -0.006(3) -0.007(3) -0.001(3)

C19 0.031(4) 0.055(6) 0.086(8) -0.013(5) -0.027(5) 0.012(4)

C20 0.033(4) 0.037(4) 0.038(4) -0.004(3) -0.013(3) 0.001(3)

C21 0.043(5) 0.040(5) 0.042(5) -0.008(4) -0.015(4) -0.013(4)

C22 0.035(4) 0.065(6) 0.032(4) -0.007(4) -0.015(3) -0.002(4)

C23 0.034(4) 0.041(4) 0.036(4) 0.003(3) -0.013(3) 0.001(3)

C24 0.024(3) 0.031(4) 0.027(4) -0.004(3) -0.004(3) 0.003(3)

C25 0.026(3) 0.033(4) 0.031(4) -0.004(3) -0.004(3) 0.004(3)

C26 0.034(4) 0.026(4) 0.044(5) 0.001(3) -0.002(3) 0.007(3)

C27 0.048(5) 0.026(4) 0.043(5) -0.002(3) -0.001(4) 0.006(3)

C28 0.058(5) 0.022(4) 0.049(5) -0.012(3) -0.003(4) -0.009(4)

C29 0.037(4) 0.025(4) 0.046(5) -0.009(3) -0.002(3) -0.004(3)

C30 0.030(4) 0.034(4) 0.037(4) -0.013(3) -0.011(3) -0.001(3)

C31 0.031(4) 0.034(4) 0.046(5) -0.008(3) -0.017(3) 0.003(3)

C32 0.034(4) 0.019(3) 0.044(4) -0.010(3) -0.008(3) 0.004(3)

C33 0.023(4) 0.035(4) 0.059(5) -0.008(4) -0.011(3) -0.005(3)

C34 0.036(4) 0.035(4) 0.030(4) -0.010(3) -0.011(3) 0.007(3)

C35 0.032(4) 0.027(4) 0.043(5) -0.007(3) -0.012(3) 0.004(3)

C36 0.053(7) 0.061(7) 0.104(10) -0.035(7) -0.025(7) 0.008(6)

C37 0.074(9) 0.102(12) 0.099(12) -0.031(9) -0.001(8) -0.005(8)

C38 0.118(13) 0.088(11) 0.063(9) 0.006(8) -0.021(9) -0.024(10)

C39 0.139(16) 0.144(17) 0.086(12) -0.015(11) -0.038(11) -0.051(14)

C40 0.078(10) 0.097(13) 0.105(14) -0.002(10) -0.009(9) 0.021(9)

C41 0.100(15) 0.28(3) 0.15(2) 0.12(2) -0.058(14) -0.055(18)

Cu1 0.0244(4) 0.0324(5) 0.0410(5) -0.0053(4) -0.0120(4) 0.0034(3)

N1 0.026(3) 0.051(4) 0.035(4) -0.002(3) -0.011(3) 0.009(3)

N2 0.031(3) 0.043(4) 0.036(4) -0.004(3) -0.011(3) -0.006(3)

N3 0.039(4) 0.044(4) 0.046(5) -0.003(3) -0.003(3) -0.005(3)

N4 0.050(5) 0.043(4) 0.043(5) -0.005(3) 0.005(3) 0.007(4)

N5 0.025(3) 0.023(3) 0.031(3) -0.008(2) -0.011(2) 0.001(2)

N6 0.032(3) 0.024(3) 0.026(3) -0.004(2) -0.007(2) -0.001(2)

N7 0.039(4) 0.049(4) 0.035(4) -0.001(3) -0.006(3) -0.003(3)

N8 0.037(4) 0.046(4) 0.053(5) -0.005(4) -0.018(3) 0.009(3)

N9 0.056(5) 0.035(4) 0.062(5) -0.021(4) -0.020(4) 0.007(3)

N10 0.040(4) 0.058(5) 0.084(7) -0.017(5) -0.012(4) -0.011(4)

N11 0.046(4) 0.056(5) 0.053(5) -0.012(4) 0.005(4) 0.001(4)

N12 0.069(6) 0.048(5) 0.038(4) -0.016(3) -0.012(4) 0.000(4)

N13 0.060(7) 0.072(8) 0.138(12) -0.022(7) -0.027(7) -0.010(6)

N14 0.143(16) 0.20(2) 0.122(16) -0.006(14) -0.053(13) 0.019(14)

N15 0.180(19) 0.107(14) 0.139(17) 0.011(12) -0.017(14) 0.009(12)

O1 0.036(3) 0.027(3) 0.053(4) -0.001(2) -0.004(3) -0.001(2)

O2 0.031(3) 0.025(3) 0.053(4) -0.003(2) -0.014(2) 0.004(2)

O3 0.027(3) 0.027(3) 0.048(3) -0.013(2) -0.008(2) 0.006(2)

O4 0.031(3) 0.028(3) 0.058(4) -0.012(3) -0.019(3) 0.007(2)

O5 0.041(3) 0.037(3) 0.051(4) -0.008(3) -0.004(3) 0.005(3)

O6 0.070(5) 0.031(3) 0.049(4) -0.005(3) -0.007(3) -0.004(3)

O7 0.087(6) 0.081(6) 0.043(4) -0.020(4) 0.003(4) -0.006(5)

O8 0.030(3) 0.057(4) 0.054(4) -0.013(3) -0.001(3) 0.000(3)

O9 0.044(4) 0.048(4) 0.049(4) -0.010(3) -0.011(3) -0.007(3)

O10 0.065(5) 0.105(7) 0.048(5) -0.024(4) 0.016(4) 0.013(5)

O11 0.034(3) 0.049(4) 0.061(4) -0.029(3) -0.024(3) 0.010(3)

Gd1 0.02454(18) 0.02602(18) 0.0341(2) -0.00659(15) -0.00876(14) 0.00298(14)

W1 0.02102(13) 0.02209(13) 0.02896(15) -0.00630(10) -0.00751(10) 0.00162(10)

 

_geom_special_details

;

 All esds (except the esd in the dihedral angle between two l.s. planes)

 are estimated using the full covariance matrix.  The cell esds are taken

 into account individually in the estimation of esds in distances, angles

 and torsion angles; correlations between esds in cell parameters are only

 used when they are defined by crystal symmetry.  An approximate (isotropic)

 treatment of cell esds is used for estimating esds involving l.s. planes.

;

 

loop_

 _geom_bond_atom_site_label_1

 _geom_bond_atom_site_label_2

 _geom_bond_distance

 _geom_bond_site_symmetry_2

 _geom_bond_publ_flag

C1 O1 1.447(10) . ?

C1 H1A 0.9600 . ?

C1 H1B 0.9600 . ?

C1 H1C 0.9600 . ?

C2 C3 1.362(11) . ?

C2 O1 1.399(10) . ?

C2 C7 1.402(11) . ?

C3 C4 1.391(14) . ?

C3 H3 0.9300 . ?

C4 C5 1.362(14) . ?

C4 H4 0.9300 . ?

C5 C6 1.419(12) . ?

C5 H5 0.9300 . ?

C6 C7 1.387(11) . ?

C6 C8 1.444(13) . ?

C7 O2 1.333(9) . ?

C8 N1 1.292(12) . ?

C8 H8 0.9300 . ?

C9 N1 1.477(11) . ?

C9 C10 1.521(14) . ?

C9 H9A 0.9700 . ?

C9 H9B 0.9700 . ?

C10 C11 1.507(13) . ?

C10 H10A 0.9700 . ?

C10 H10B 0.9700 . ?

C11 N2 1.470(10) . ?

C11 H11A 0.9700 . ?

C11 H11B 0.9700 . ?

C12 N2 1.276(11) . ?

C12 C13 1.442(12) . ?

C12 H12 0.9300 . ?

C13 C18 1.400(10) . ?

C13 C14 1.425(12) . ?

C14 C15 1.379(14) . ?

C14 H14 0.9300 . ?

C15 C16 1.393(13) . ?

C15 H15 0.9300 . ?

C16 C17 1.351(11) . ?

C16 H16 0.9300 . ?

C17 O4 1.400(9) . ?

C17 C18 1.422(10) . ?

C18 O3 1.322(9) . ?

C19 O4 1.447(9) . ?

C19 H19A 0.9600 . ?

C19 H19B 0.9600 . ?

C19 H19C 0.9600 . ?

C20 N5 1.339(10) . ?

C20 C21 1.384(11) . ?

C20 H20 0.9300 . ?

C21 C22 1.390(13) . ?

C21 H21 0.9300 . ?

C22 C23 1.374(13) . ?

C22 H22 0.9300 . ?

C23 C24 1.397(10) . ?

C23 H23 0.9300 . ?

C24 N5 1.365(9) . ?

C24 C25 1.451(11) . ?

C25 C26 1.368(10) . ?

C25 N6 1.372(9) . ?

C26 C27 1.386(12) . ?

C26 H26 0.9300 . ?

C27 C28 1.383(13) . ?

C27 H27 0.9300 . ?

C28 C29 1.374(11) . ?

C28 H28 0.9300 . ?

C29 N6 1.338(10) . ?

C29 H29 0.9300 . ?

C30 N7 1.171(11) . ?

C30 W1 2.176(8) . ?

C31 N8 1.159(10) . ?

C31 W1 2.144(8) . ?

C32 N9 1.134(10) . ?

C32 W1 2.152(7) . ?

C33 N10 1.141(11) . ?

C33 W1 2.136(7) . ?

C34 N11 1.147(11) . ?

C34 W1 2.162(8) . ?

C35 N12 1.155(11) . ?

C35 W1 2.137(8) . ?

C36 N13 1.144(17) . ?

C36 C37 1.448(19) . ?

C37 H37A 0.9600 . ?

C37 H37B 0.9600 . ?

C37 H37C 0.9600 . ?

C38 N14 1.09(2) . ?

C38 C39 1.46(2) . ?

C39 H39A 0.9600 . ?

C39 H39B 0.9600 . ?

C39 H39C 0.9600 . ?

C40 N15 1.13(2) . ?

C40 C41 1.38(2) . ?

C41 H41A 0.9600 . ?

C41 H41B 0.9600 . ?

C41 H41C 0.9600 . ?

Cu1 O3 1.964(5) . ?

Cu1 N1 1.966(7) . ?

Cu1 O2 1.969(6) . ?

Cu1 N2 1.992(7) . ?

Cu1 Gd1 3.4656(10) . ?

N3 O7 1.202(10) . ?

N3 O5 1.268(10) . ?

N3 O6 1.289(10) . ?

N3 Gd1 2.879(8) . ?

N4 O10 1.215(10) . ?

N4 O9 1.246(10) . ?

N4 O8 1.256(10) . ?

N4 Gd1 2.886(8) . ?

N5 W1 2.220(5) . ?

N6 W1 2.232(6) . ?

O1 Gd1 2.472(6) . ?

O2 Gd1 2.320(5) . ?

O3 Gd1 2.349(5) . ?

O4 Gd1 2.501(5) . ?

O5 Gd1 2.440(6) . ?

O6 Gd1 2.470(7) . ?

O8 Gd1 2.445(6) . ?

O9 Gd1 2.468(7) . ?

O11 Gd1 2.383(5) . ?

 

loop_

 _geom_angle_atom_site_label_1

 _geom_angle_atom_site_label_2

 _geom_angle_atom_site_label_3

 _geom_angle

 _geom_angle_site_symmetry_1

 _geom_angle_site_symmetry_3

 _geom_angle_publ_flag

O1 C1 H1A 109.5 . . ?

O1 C1 H1B 109.5 . . ?

H1A C1 H1B 109.5 . . ?

O1 C1 H1C 109.5 . . ?

H1A C1 H1C 109.5 . . ?

H1B C1 H1C 109.5 . . ?

C3 C2 O1 124.7(8) . . ?

C3 C2 C7 121.7(8) . . ?

O1 C2 C7 113.6(7) . . ?

C2 C3 C4 120.2(9) . . ?

C2 C3 H3 119.9 . . ?

C4 C3 H3 119.9 . . ?

C5 C4 C3 119.9(8) . . ?

C5 C4 H4 120.1 . . ?

C3 C4 H4 120.1 . . ?

C4 C5 C6 120.3(9) . . ?

C4 C5 H5 119.8 . . ?

C6 C5 H5 119.8 . . ?

C7 C6 C5 119.8(8) . . ?

C7 C6 C8 123.0(8) . . ?

C5 C6 C8 117.2(8) . . ?

O2 C7 C6 123.1(7) . . ?

O2 C7 C2 118.8(7) . . ?

C6 C7 C2 118.1(7) . . ?

N1 C8 C6 127.7(7) . . ?

N1 C8 H8 116.1 . . ?

C6 C8 H8 116.1 . . ?

N1 C9 C10 111.3(7) . . ?

N1 C9 H9A 109.4 . . ?

C10 C9 H9A 109.4 . . ?

N1 C9 H9B 109.4 . . ?

C10 C9 H9B 109.4 . . ?

H9A C9 H9B 108.0 . . ?

C11 C10 C9 112.8(8) . . ?

C11 C10 H10A 109.0 . . ?

C9 C10 H10A 109.0 . . ?

C11 C10 H10B 109.0 . . ?

C9 C10 H10B 109.0 . . ?

H10A C10 H10B 107.8 . . ?

N2 C11 C10 113.7(7) . . ?

N2 C11 H11A 108.8 . . ?

C10 C11 H11A 108.8 . . ?

N2 C11 H11B 108.8 . . ?

C10 C11 H11B 108.8 . . ?

H11A C11 H11B 107.7 . . ?

N2 C12 C13 129.9(8) . . ?

N2 C12 H12 115.1 . . ?

C13 C12 H12 115.1 . . ?

C18 C13 C14 120.0(8) . . ?

C18 C13 C12 122.4(7) . . ?

C14 C13 C12 117.5(7) . . ?

C15 C14 C13 119.3(8) . . ?

C15 C14 H14 120.3 . . ?

C13 C14 H14 120.3 . . ?

C14 C15 C16 121.0(8) . . ?

C14 C15 H15 119.5 . . ?

C16 C15 H15 119.5 . . ?

C17 C16 C15 119.7(8) . . ?

C17 C16 H16 120.1 . . ?

C15 C16 H16 120.1 . . ?

C16 C17 O4 125.1(7) . . ?

C16 C17 C18 122.2(8) . . ?

O4 C17 C18 112.7(6) . . ?

O3 C18 C13 123.7(7) . . ?

O3 C18 C17 118.6(7) . . ?

C13 C18 C17 117.7(7) . . ?

O4 C19 H19A 109.5 . . ?

O4 C19 H19B 109.5 . . ?

H19A C19 H19B 109.5 . . ?

O4 C19 H19C 109.5 . . ?

H19A C19 H19C 109.5 . . ?

H19B C19 H19C 109.5 . . ?

N5 C20 C21 122.3(8) . . ?

N5 C20 H20 118.9 . . ?

C21 C20 H20 118.9 . . ?

C20 C21 C22 119.1(8) . . ?

C20 C21 H21 120.5 . . ?

C22 C21 H21 120.5 . . ?

C23 C22 C21 118.9(7) . . ?

C23 C22 H22 120.5 . . ?

C21 C22 H22 120.5 . . ?

C22 C23 C24 120.0(8) . . ?

C22 C23 H23 120.0 . . ?

C24 C23 H23 120.0 . . ?

N5 C24 C23 120.4(7) . . ?

N5 C24 C25 117.1(6) . . ?

C23 C24 C25 122.5(7) . . ?

C26 C25 N6 120.5(8) . . ?

C26 C25 C24 124.0(7) . . ?

N6 C25 C24 115.4(6) . . ?

C25 C26 C27 120.3(8) . . ?

C25 C26 H26 119.8 . . ?

C27 C26 H26 119.8 . . ?

C28 C27 C26 118.6(8) . . ?

C28 C27 H27 120.7 . . ?

C26 C27 H27 120.7 . . ?

C29 C28 C27 119.2(8) . . ?

C29 C28 H28 120.4 . . ?

C27 C28 H28 120.4 . . ?

N6 C29 C28 122.3(8) . . ?

N6 C29 H29 118.8 . . ?

C28 C29 H29 118.8 . . ?

N7 C30 W1 175.8(7) . . ?

N8 C31 W1 179.5(8) . . ?

N9 C32 W1 177.4(8) . . ?

N10 C33 W1 177.0(8) . . ?

N11 C34 W1 177.5(8) . . ?

N12 C35 W1 174.6(7) . . ?

N13 C36 C37 175.5(16) . . ?

C36 C37 H37A 109.5 . . ?

C36 C37 H37B 109.5 . . ?

H37A C37 H37B 109.5 . . ?

C36 C37 H37C 109.5 . . ?

H37A C37 H37C 109.5 . . ?

H37B C37 H37C 109.5 . . ?

N14 C38 C39 174(2) . . ?

C38 C39 H39A 109.5 . . ?

C38 C39 H39B 109.5 . . ?

H39A C39 H39B 109.5 . . ?

C38 C39 H39C 109.5 . . ?

H39A C39 H39C 109.5 . . ?

H39B C39 H39C 109.5 . . ?

N15 C40 C41 178(2) . . ?

C40 C41 H41A 109.5 . . ?

C40 C41 H41B 109.5 . . ?

H41A C41 H41B 109.5 . . ?

C40 C41 H41C 109.5 . . ?

H41A C41 H41C 109.5 . . ?

H41B C41 H41C 109.5 . . ?

O3 Cu1 N1 169.9(3) . . ?

O3 Cu1 O2 79.1(2) . . ?

N1 Cu1 O2 90.8(3) . . ?

O3 Cu1 N2 92.3(3) . . ?

N1 Cu1 N2 97.3(3) . . ?

O2 Cu1 N2 160.0(3) . . ?

O3 Cu1 Gd1 40.50(16) . . ?

N1 Cu1 Gd1 129.5(2) . . ?

O2 Cu1 Gd1 39.67(15) . . ?

N2 Cu1 Gd1 132.4(2) . . ?

C8 N1 C9 116.0(7) . . ?

C8 N1 Cu1 125.7(6) . . ?

C9 N1 Cu1 118.3(6) . . ?

C12 N2 C11 115.0(7) . . ?

C12 N2 Cu1 122.7(6) . . ?

C11 N2 Cu1 122.3(6) . . ?

O7 N3 O5 122.0(9) . . ?

O7 N3 O6 122.4(8) . . ?

O5 N3 O6 115.6(8) . . ?

O7 N3 Gd1 171.2(7) . . ?

O5 N3 Gd1 57.3(4) . . ?

O6 N3 Gd1 58.7(4) . . ?

O10 N4 O9 121.9(9) . . ?

O10 N4 O8 122.7(9) . . ?

O9 N4 O8 115.4(7) . . ?

O10 N4 Gd1 177.0(7) . . ?

O9 N4 Gd1 58.2(4) . . ?

O8 N4 Gd1 57.2(4) . . ?

C20 N5 C24 119.3(6) . . ?

C20 N5 W1 123.8(5) . . ?

C24 N5 W1 116.6(4) . . ?

C29 N6 C25 119.0(7) . . ?

C29 N6 W1 124.0(5) . . ?

C25 N6 W1 117.0(5) . . ?

C2 O1 C1 116.3(6) . . ?

C2 O1 Gd1 117.7(5) . . ?

C1 O1 Gd1 125.7(5) . . ?

C7 O2 Cu1 129.2(5) . . ?

C7 O2 Gd1 123.1(5) . . ?

Cu1 O2 Gd1 107.5(2) . . ?

C18 O3 Cu1 127.7(5) . . ?

C18 O3 Gd1 123.0(4) . . ?

Cu1 O3 Gd1 106.6(2) . . ?

C17 O4 C19 116.9(7) . . ?

C17 O4 Gd1 117.4(4) . . ?

C19 O4 Gd1 124.5(5) . . ?

N3 O5 Gd1 96.8(5) . . ?

N3 O6 Gd1 94.8(5) . . ?

N4 O8 Gd1 97.2(5) . . ?

N4 O9 Gd1 96.3(5) . . ?

O2 Gd1 O3 64.86(19) . . ?

O2 Gd1 O11 139.6(2) . . ?

O3 Gd1 O11 149.1(2) . . ?

O2 Gd1 O5 74.6(2) . . ?

O3 Gd1 O5 105.7(2) . . ?

O11 Gd1 O5 73.8(2) . . ?

O2 Gd1 O8 122.3(2) . . ?

O3 Gd1 O8 117.4(2) . . ?

O11 Gd1 O8 69.8(2) . . ?

O5 Gd1 O8 136.8(2) . . ?

O2 Gd1 O9 80.3(2) . . ?

O3 Gd1 O9 74.7(2) . . ?

O11 Gd1 O9 120.7(2) . . ?

O5 Gd1 O9 151.4(2) . . ?

O8 Gd1 O9 51.0(2) . . ?

O2 Gd1 O6 104.4(2) . . ?

O3 Gd1 O6 81.1(2) . . ?

O11 Gd1 O6 74.6(2) . . ?

O5 Gd1 O6 52.3(2) . . ?

O8 Gd1 O6 133.2(2) . . ?

O9 Gd1 O6 150.6(2) . . ?

O2 Gd1 O1 65.83(19) . . ?

O3 Gd1 O1 128.79(19) . . ?

O11 Gd1 O1 81.3(2) . . ?

O5 Gd1 O1 73.2(2) . . ?

O8 Gd1 O1 79.1(2) . . ?

O9 Gd1 O1 84.4(2) . . ?

O6 Gd1 O1 124.4(2) . . ?

O2 Gd1 O4 128.28(18) . . ?

O3 Gd1 O4 64.66(17) . . ?

O11 Gd1 O4 91.62(19) . . ?

O5 Gd1 O4 130.3(2) . . ?

O8 Gd1 O4 73.7(2) . . ?

O9 Gd1 O4 76.5(2) . . ?

O6 Gd1 O4 78.1(2) . . ?

O1 Gd1 O4 152.6(2) . . ?

O2 Gd1 N3 91.0(2) . . ?

O3 Gd1 N3 95.7(2) . . ?

O11 Gd1 N3 70.2(2) . . ?

O5 Gd1 N3 25.9(2) . . ?

O8 Gd1 N3 139.9(2) . . ?

O9 Gd1 N3 169.1(2) . . ?

O6 Gd1 N3 26.5(2) . . ?

O1 Gd1 N3 98.1(2) . . ?

O4 Gd1 N3 104.4(2) . . ?

O2 Gd1 N4 102.1(2) . . ?

O3 Gd1 N4 95.7(2) . . ?

O11 Gd1 N4 95.4(2) . . ?

O5 Gd1 N4 153.7(2) . . ?

O8 Gd1 N4 25.6(2) . . ?

O9 Gd1 N4 25.4(2) . . ?

O6 Gd1 N4 148.8(2) . . ?

O1 Gd1 N4 81.7(2) . . ?

O4 Gd1 N4 72.6(2) . . ?

N3 Gd1 N4 165.4(2) . . ?

O2 Gd1 Cu1 32.81(14) . . ?

O3 Gd1 Cu1 32.90(13) . . ?

O11 Gd1 Cu1 158.26(16) . . ?

O5 Gd1 Cu1 85.32(15) . . ?

O8 Gd1 Cu1 131.71(16) . . ?

O9 Gd1 Cu1 80.74(15) . . ?

O6 Gd1 Cu1 88.05(17) . . ?

O1 Gd1 Cu1 98.58(14) . . ?

O4 Gd1 Cu1 97.56(12) . . ?

N3 Gd1 Cu1 88.35(15) . . ?

N4 Gd1 Cu1 106.14(18) . . ?

C35 W1 C33 83.7(3) . . ?

C35 W1 C31 75.1(3) . . ?

C33 W1 C31 70.3(3) . . ?

C35 W1 C32 141.9(3) . . ?

C33 W1 C32 101.7(3) . . ?

C31 W1 C32 71.5(3) . . ?

C35 W1 C34 143.3(3) . . ?

C33 W1 C34 73.6(3) . . ?

C31 W1 C34 121.1(3) . . ?

C32 W1 C34 72.3(3) . . ?

C35 W1 C30 72.1(3) . . ?

C33 W1 C30 138.2(3) . . ?

C31 W1 C30 70.9(3) . . ?

C32 W1 C30 79.9(3) . . ?

C34 W1 C30 142.3(3) . . ?

C35 W1 N5 112.8(3) . . ?

C33 W1 N5 145.3(3) . . ?

C31 W1 N5 141.9(3) . . ?

C32 W1 N5 84.1(3) . . ?

C34 W1 N5 75.8(3) . . ?

C30 W1 N5 76.5(2) . . ?

C35 W1 N6 72.7(3) . . ?

C33 W1 N6 83.6(3) . . ?

C31 W1 N6 140.3(3) . . ?

C32 W1 N6 145.1(3) . . ?

C34 W1 N6 76.3(3) . . ?

C30 W1 N6 118.9(3) . . ?

N5 W1 N6 73.5(2) . . ?

 

_diffrn_measured_fraction_theta_max    0.989

_diffrn_reflns_theta_full              30.41

_diffrn_measured_fraction_theta_full   0.989

_refine_diff_density_max    2.730

_refine_diff_density_min   -2.015

_refine_diff_density_rms    0.177

#===end


data_C2

 

_audit_creation_method            SHELXL-97

_chemical_name_systematic

;

 ?

;

_chemical_name_common             ?

_chemical_melting_point           ?

_chemical_formula_moiety          ?

_chemical_formula_sum

 'C41 H39 Cu N15 O11 Tb W'

_chemical_formula_weight          1324.18

 

loop_

 _atom_type_symbol

 _atom_type_description

 _atom_type_scat_dispersion_real

 _atom_type_scat_dispersion_imag

 _atom_type_scat_source

 'C'  'C'   0.0033   0.0016

 'International Tables Vol C Tables 4.2.6.8 and 6.1.1.4'

 'H'  'H'   0.0000   0.0000

 'International Tables Vol C Tables 4.2.6.8 and 6.1.1.4'

 'Cu'  'Cu'   0.3201   1.2651

 'International Tables Vol C Tables 4.2.6.8 and 6.1.1.4'

 'N'  'N'   0.0061   0.0033

 'International Tables Vol C Tables 4.2.6.8 and 6.1.1.4'

 'O'  'O'   0.0106   0.0060

 'International Tables Vol C Tables 4.2.6.8 and 6.1.1.4'

 'Tb'  'Tb'  -0.1723   4.1537

 'International Tables Vol C Tables 4.2.6.8 and 6.1.1.4'

 'W'  'W'  -0.8490   6.8722

 'International Tables Vol C Tables 4.2.6.8 and 6.1.1.4'

 

_symmetry_cell_setting            Triclinic

_symmetry_space_group_name_H-M    P-1

 

loop_

 _symmetry_equiv_pos_as_xyz

 'x, y, z'

 '-x, -y, -z'

 

_cell_length_a                    11.884(2)

_cell_length_b                    14.068(3)

_cell_length_c                    14.851(3)

_cell_angle_alpha                 79.119(16)

_cell_angle_beta                  82.145(16)

_cell_angle_gamma                 85.588(15)

_cell_volume                      2412.1(8)

_cell_formula_units_Z             2

_cell_measurement_temperature     293(2)

_cell_measurement_reflns_used     9805

_cell_measurement_theta_min       2.70

_cell_measurement_theta_max       25.23

 

_exptl_crystal_description        prism

_exptl_crystal_colour             brown

_exptl_crystal_size_max           0.2

_exptl_crystal_size_mid           0.06

_exptl_crystal_size_min           0.02

_exptl_crystal_density_meas       'not measured'

_exptl_crystal_density_diffrn     1.823

_exptl_crystal_density_method     'not measured'

_exptl_crystal_F_000              1292

_exptl_absorpt_coefficient_mu     4.339

_exptl_absorpt_correction_type    multi-scan

_exptl_absorpt_correction_T_min   0.3512

_exptl_absorpt_correction_T_max   0.7189

_exptl_absorpt_process_details

;

[c.f. r.h. blessing, acta cryst. (1995), a51, 33-38]

;

_exptl_special_details

;

 ?

;

 

_diffrn_ambient_temperature       293(2)

_diffrn_radiation_wavelength      0.71073

_diffrn_radiation_type            MoK\a

_diffrn_radiation_source          'fine-focus sealed tube'

_diffrn_radiation_monochromator   graphite

_diffrn_measurement_device_type   'STOE IPDS II'

_diffrn_measurement_method        'omega scans'

_diffrn_detector_area_resol_mean  ?

_diffrn_standards_number          ?

_diffrn_standards_interval_count  ?

_diffrn_standards_interval_time   ?

_diffrn_standards_decay_%         ?

_diffrn_reflns_number             16697

_diffrn_reflns_av_R_equivalents   0.1640

_diffrn_reflns_av_sigmaI/netI     0.1377

_diffrn_reflns_limit_h_min        -14

_diffrn_reflns_limit_h_max        14

_diffrn_reflns_limit_k_min        -16

_diffrn_reflns_limit_k_max        16

_diffrn_reflns_limit_l_min        -17

_diffrn_reflns_limit_l_max        17

_diffrn_reflns_theta_min          2.70

_diffrn_reflns_theta_max          25.23

_reflns_number_total              7907

_reflns_number_gt                 5739

_reflns_threshold_expression      >2sigma(I)

 

_computing_data_collection        'X-Area'

_computing_cell_refinement        'X-Area'

_computing_data_reduction         'X-Area'

_computing_structure_solution     'SHELXS-97 (Sheldrick, 1997)'

_computing_structure_refinement   'SHELXL-97 (Sheldrick, 1997)'

_computing_molecular_graphics     ?

_computing_publication_material   ?

 

_refine_special_details

;

 Refinement of F^2^ against ALL reflections.  The weighted R-factor wR and

 goodness of fit S are based on F^2^, conventional R-factors R are based

 on F, with F set to zero for negative F^2^. The threshold expression of

 F^2^ > 2sigma(F^2^) is used only for calculating R-factors(gt) etc. and is

 not relevant to the choice of reflections for refinement.  R-factors based

 on F^2^ are statistically about twice as large as those based on F, and R-

 factors based on ALL data will be even larger.

;

 

_refine_ls_structure_factor_coef  Fsqd

_refine_ls_matrix_type            full

_refine_ls_weighting_scheme       calc

_refine_ls_weighting_details

 'calc w=1/[\s^2^(Fo^2^)+(0.0506P)^2^+116.2199P] where P=(Fo^2^+2Fc^2^)/3'

_atom_sites_solution_primary      direct

_atom_sites_solution_secondary    difmap

_atom_sites_solution_hydrogens    geom

_refine_ls_hydrogen_treatment     constr

_refine_ls_extinction_method      SHELXL

_refine_ls_extinction_coef        0.0011(3)

_refine_ls_extinction_expression

 'Fc^*^=kFc[1+0.001xFc^2^\l^3^/sin(2\q)]^-1/4^'

_refine_ls_number_reflns          7907

_refine_ls_number_parameters      615

_refine_ls_number_restraints      6

_refine_ls_R_factor_all           0.1462

_refine_ls_R_factor_gt            0.1129

_refine_ls_wR_factor_ref          0.2590

_refine_ls_wR_factor_gt           0.2421

_refine_ls_goodness_of_fit_ref    1.184

_refine_ls_restrained_S_all       1.184

_refine_ls_shift/su_max           0.003

_refine_ls_shift/su_mean          0.000

 

loop_

 _atom_site_label

 _atom_site_type_symbol

 _atom_site_fract_x

 _atom_site_fract_y

 _atom_site_fract_z

 _atom_site_U_iso_or_equiv

 _atom_site_adp_type

 _atom_site_occupancy

 _atom_site_symmetry_multiplicity

 _atom_site_calc_flag

 _atom_site_refinement_flags

 _atom_site_disorder_assembly

 _atom_site_disorder_group

C1 C 0.145(2) -0.142(2) 0.840(2) 0.050(6) Uani 1 1 d U . .

H1A H 0.0856 -0.0957 0.8200 0.076 Uiso 1 1 calc R . .

H1B H 0.1239 -0.1724 0.9028 0.076 Uiso 1 1 calc R . .

H1C H 0.1573 -0.1898 0.8011 0.076 Uiso 1 1 calc R . .

C2 C 0.341(2) -0.1482(17) 0.8607(19) 0.040(6) Uani 1 1 d . . .

C3 C 0.351(2) -0.246(2) 0.8872(19) 0.048(7) Uani 1 1 d . . .

H3 H 0.2881 -0.2823 0.8906 0.058 Uiso 1 1 calc R . .

C4 C 0.455(3) -0.294(2) 0.910(2) 0.065(9) Uani 1 1 d . . .

H4 H 0.4613 -0.3607 0.9262 0.077 Uiso 1 1 calc R . .

C5 C 0.544(3) -0.2393(19) 0.907(2) 0.056(8) Uani 1 1 d . . .

H5 H 0.6117 -0.2699 0.9240 0.067 Uiso 1 1 calc R . .

C6 C 0.539(2) -0.1378(17) 0.8781(16) 0.037(6) Uani 1 1 d . . .

C7 C 0.4376(19) -0.0898(15) 0.8551(16) 0.030(5) Uani 1 1 d . . .

C8 C 0.642(2) -0.0872(18) 0.8751(16) 0.037(6) Uani 1 1 d . . .

H8 H 0.7050 -0.1257 0.8932 0.045 Uiso 1 1 calc R . .

C9 C 0.774(2) 0.035(2) 0.8433(19) 0.049(7) Uani 1 1 d . . .

H9A H 0.8014 0.0606 0.7794 0.059 Uiso 1 1 calc R . .

H9B H 0.8238 -0.0210 0.8640 0.059 Uiso 1 1 calc R . .

C10 C 0.778(2) 0.1108(19) 0.902(2) 0.047(7) Uani 1 1 d . . .

H10A H 0.7317 0.0918 0.9608 0.056 Uiso 1 1 calc R . .

H10B H 0.8558 0.1136 0.9145 0.056 Uiso 1 1 calc R . .

C11 C 0.738(2) 0.208(2) 0.859(2) 0.054(8) Uani 1 1 d . . .

H11A H 0.7802 0.2248 0.7980 0.064 Uiso 1 1 calc R . .

H11B H 0.7534 0.2544 0.8956 0.064 Uiso 1 1 calc R . .

C12 C 0.559(2) 0.297(2) 0.8594(19) 0.046(7) Uani 1 1 d . . .

H12 H 0.6014 0.3422 0.8768 0.056 Uiso 1 1 calc R . .

C13 C 0.443(2) 0.3282(17) 0.8462(19) 0.044(6) Uani 1 1 d . . .

C14 C 0.413(3) 0.422(2) 0.864(2) 0.058(8) Uani 1 1 d . . .

H14 H 0.4630 0.4575 0.8853 0.069 Uiso 1 1 calc R . .

C15 C 0.301(2) 0.462(2) 0.847(2) 0.054(8) Uani 1 1 d . . .

H15 H 0.2764 0.5230 0.8600 0.065 Uiso 1 1 calc R . .

C16 C 0.227(3) 0.4077(17) 0.812(2) 0.051(7) Uani 1 1 d . . .

H16 H 0.1570 0.4352 0.7973 0.061 Uiso 1 1 calc R . .

C17 C 0.259(2) 0.3166(16) 0.7984(16) 0.039(6) Uani 1 1 d . . .

C18 C 0.3703(19) 0.2737(15) 0.8123(14) 0.026(5) Uani 1 1 d . . .

C19 C 0.084(2) 0.293(2) 0.740(2) 0.065(9) Uani 1 1 d . . .

H19A H 0.0495 0.2445 0.7171 0.097 Uiso 1 1 calc R . .

H19B H 0.0900 0.3508 0.6928 0.097 Uiso 1 1 calc R . .

H19C H 0.0381 0.3084 0.7940 0.097 Uiso 1 1 calc R . .

C20 C 0.573(2) 0.2130(17) 0.4048(15) 0.032(5) Uani 1 1 d . . .

H20 H 0.6031 0.1536 0.4333 0.038 Uiso 1 1 calc R . .

C21 C 0.492(2) 0.210(2) 0.352(2) 0.050(7) Uani 1 1 d . . .

H21 H 0.4707 0.1524 0.3395 0.060 Uiso 1 1 calc R . .

C22 C 0.442(2) 0.299(3) 0.3165(18) 0.059(9) Uani 1 1 d . . .

H22 H 0.3808 0.3006 0.2829 0.071 Uiso 1 1 calc R . .

C23 C 0.481(2) 0.3840(18) 0.3303(18) 0.041(6) Uani 1 1 d . . .

H23 H 0.4488 0.4436 0.3045 0.050 Uiso 1 1 calc R . .

C24 C 0.5715(18) 0.3788(15) 0.3848(13) 0.025(5) Uani 1 1 d . . .

C25 C 0.611(2) 0.4638(18) 0.4045(17) 0.039(6) Uani 1 1 d . . .

C26 C 0.566(2) 0.5559(18) 0.3871(15) 0.037(6) Uani 1 1 d . . .

H26 H 0.5000 0.5667 0.3585 0.044 Uiso 1 1 calc R . .

C27 C 0.612(2) 0.6358(17) 0.4090(17) 0.036(5) Uani 1 1 d . . .

H27 H 0.5785 0.6980 0.3950 0.043 Uiso 1 1 calc R . .

C28 C 0.708(3) 0.6185(16) 0.452(2) 0.056(9) Uani 1 1 d . . .

H28 H 0.7430 0.6688 0.4681 0.068 Uiso 1 1 calc R . .

C29 C 0.752(3) 0.5232(19) 0.4715(16) 0.044(6) Uani 1 1 d . . .

H29 H 0.8180 0.5113 0.5003 0.052 Uiso 1 1 calc R . .

C30 C 0.655(2) 0.1979(17) 0.5904(16) 0.035(5) Uiso 1 1 d . . .

C31 C 0.877(2) 0.2085(17) 0.5863(14) 0.031(5) Uani 1 1 d . . .

C32 C 0.8174(19) 0.1604(15) 0.4434(14) 0.027(5) Uiso 1 1 d . . .

C33 C 0.929(2) 0.3570(18) 0.4786(18) 0.041(6) Uani 1 1 d . . .

C34 C 0.8313(18) 0.3299(14) 0.3501(13) 0.021(4) Uiso 1 1 d . . .

C35 C 0.739(2) 0.3586(17) 0.608(2) 0.053(9) Uani 1 1 d . . .

C36 C 0.758(4) 0.531(2) 0.827(2) 0.070(11) Uani 1 1 d . . .

C37 C 0.859(4) 0.537(3) 0.754(3) 0.12(2) Uani 1 1 d . . .

H37A H 0.9269 0.5177 0.7830 0.179 Uiso 1 1 calc R . .

H37B H 0.8646 0.6030 0.7214 0.179 Uiso 1 1 calc R . .

H37C H 0.8515 0.4955 0.7115 0.179 Uiso 1 1 calc R . .

C38 C 0.996(5) 0.358(4) 1.005(3) 0.105(18) Uani 1 1 d . . .

C39 C 1.073(4) 0.338(3) 1.059(3) 0.107(15) Uani 1 1 d . . .

H39A H 1.1467 0.3508 1.0247 0.160 Uiso 1 1 calc R . .

H39B H 1.0721 0.2712 1.0884 0.160 Uiso 1 1 calc R . .

H39C H 1.0591 0.3782 1.1058 0.160 Uiso 1 1 calc R . .

C40 C 0.839(4) 0.837(3) 0.674(3) 0.096(15) Uani 1 1 d . . .

C41 C 0.861(4) 0.891(5) 0.587(4) 0.16(3) Uani 1 1 d . . .

H41A H 0.7903 0.9185 0.5657 0.243 Uiso 1 1 calc R . .

H41B H 0.8977 0.8502 0.5453 0.243 Uiso 1 1 calc R . .

H41C H 0.9091 0.9423 0.5880 0.243 Uiso 1 1 calc R . .

Cu1 Cu 0.5362(2) 0.1050(2) 0.8207(2) 0.0341(7) Uani 1 1 d . . .

N1 N 0.6567(18) 0.0045(14) 0.8502(14) 0.039(5) Uani 1 1 d . . .

N2 N 0.6125(16) 0.2147(15) 0.8501(14) 0.036(5) Uani 1 1 d . . .

N3 N 0.3594(18) 0.0670(15) 0.5903(14) 0.037(5) Uani 1 1 d . . .

N4 N 0.1193(18) 0.0997(14) 0.9415(14) 0.036(5) Uani 1 1 d . . .

N5 N 0.6160(15) 0.2935(12) 0.4214(12) 0.025(4) Uani 1 1 d . . .

N6 N 0.7072(15) 0.4514(12) 0.4519(13) 0.026(4) Uani 1 1 d . . .

N7 N 0.608(2) 0.1467(16) 0.6479(18) 0.055(7) Uani 1 1 d . . .

N8 N 0.929(2) 0.1589(17) 0.6373(14) 0.048(6) Uani 1 1 d . . .

N9 N 0.8478(18) 0.0910(13) 0.4154(15) 0.040(5) Uani 1 1 d . . .

N10 N 1.018(2) 0.3871(18) 0.4749(17) 0.059(6) Uiso 1 1 d . . .

N11 N 0.854(2) 0.3535(19) 0.2694(17) 0.058(7) Uani 1 1 d . . .

N12 N 0.714(3) 0.3917(18) 0.6759(16) 0.058(7) Uani 1 1 d . . .

N13 N 0.669(3) 0.532(3) 0.867(4) 0.14(2) Uani 1 1 d . . .

N14 N 0.936(6) 0.363(4) 0.953(5) 0.19(3) Uani 1 1 d . . .

N15 N 0.837(6) 0.793(5) 0.745(4) 0.18(3) Uani 1 1 d . . .

O1 O 0.2499(17) -0.0915(13) 0.8338(13) 0.049(4) Uani 1 1 d U . .

O2 O 0.4221(15) 0.0052(11) 0.8317(11) 0.037(4) Uani 1 1 d . . .

O3 O 0.3981(13) 0.1875(11) 0.7931(12) 0.039(4) Uani 1 1 d . . .

O4 O 0.1998(16) 0.2571(11) 0.7625(13) 0.044(4) Uani 1 1 d . . .

O5 O 0.3566(16) -0.0031(13) 0.6548(13) 0.048(5) Uani 1 1 d . . .

O6 O 0.3283(17) 0.1501(12) 0.6102(14) 0.052(5) Uani 1 1 d . . .

O7 O 0.386(2) 0.0564(18) 0.5098(16) 0.080(7) Uani 1 1 d . . .

O8 O 0.0844(15) 0.0855(14) 0.8682(14) 0.050(5) Uani 1 1 d . . .

O9 O 0.224(2) 0.0987(16) 0.9345(15) 0.064(6) Uani 1 1 d . . .

O10 O 0.055(2) 0.1127(18) 1.0085(15) 0.076(7) Uani 1 1 d . . .

O11 O 0.1210(15) 0.0519(12) 0.6880(11) 0.041(4) Uani 1 1 d . . .

Tb1 Tb 0.26400(9) 0.08242(8) 0.77330(8) 0.0305(3) Uani 1 1 d . . .

W1 W 0.76977(8) 0.29431(6) 0.49164(6) 0.0253(3) Uani 1 1 d . . .

 

loop_

 _atom_site_aniso_label

 _atom_site_aniso_U_11

 _atom_site_aniso_U_22

 _atom_site_aniso_U_33

 _atom_site_aniso_U_23

 _atom_site_aniso_U_13

 _atom_site_aniso_U_12

C1 0.024(12) 0.054(13) 0.071(15) -0.006(12) 0.001(11) -0.017(11)

C2 0.023(13) 0.026(12) 0.066(17) -0.007(11) 0.008(11) -0.002(11)

C3 0.026(14) 0.052(16) 0.064(18) 0.001(13) -0.001(12) -0.015(13)

C4 0.10(3) 0.036(15) 0.06(2) -0.003(13) -0.021(18) -0.007(18)

C5 0.05(2) 0.032(14) 0.08(2) -0.004(13) 0.003(15) 0.006(15)

C6 0.037(14) 0.032(12) 0.042(13) -0.008(10) -0.007(10) 0.005(12)

C7 0.020(12) 0.023(11) 0.046(13) -0.010(9) 0.000(9) -0.010(10)

C8 0.025(13) 0.048(15) 0.039(13) -0.007(11) -0.015(10) 0.014(12)

C9 0.029(14) 0.064(18) 0.054(16) -0.014(13) -0.012(11) 0.016(14)

C10 0.020(12) 0.048(15) 0.08(2) -0.011(13) -0.019(12) -0.004(12)

C11 0.012(12) 0.07(2) 0.09(2) -0.022(16) -0.016(12) -0.014(14)

C12 0.045(17) 0.043(15) 0.055(16) -0.002(12) -0.018(13) -0.020(14)

C13 0.045(16) 0.021(11) 0.066(17) -0.017(11) 0.000(13) -0.002(12)

C14 0.046(18) 0.044(16) 0.10(2) -0.040(16) -0.018(16) -0.011(15)

C15 0.028(14) 0.048(16) 0.10(2) -0.034(16) -0.028(14) 0.000(14)

C16 0.07(2) 0.023(12) 0.067(18) -0.014(12) -0.015(15) 0.003(13)

C17 0.054(17) 0.023(11) 0.039(13) -0.009(9) -0.002(11) 0.002(12)

C18 0.028(12) 0.026(11) 0.027(11) -0.012(8) -0.001(8) 0.004(10)

C19 0.008(12) 0.08(2) 0.11(3) -0.033(19) -0.018(13) 0.015(14)

C20 0.025(12) 0.037(13) 0.036(12) -0.007(10) -0.013(9) -0.002(11)

C21 0.030(15) 0.049(16) 0.074(19) -0.016(14) -0.015(13) 0.001(14)

C22 0.035(15) 0.12(3) 0.035(14) -0.022(15) -0.022(11) -0.018(18)

C23 0.032(14) 0.035(13) 0.054(16) 0.001(11) -0.011(11) 0.008(12)

C24 0.022(11) 0.032(11) 0.022(10) -0.008(8) 0.000(8) -0.006(10)

C25 0.024(12) 0.040(14) 0.044(14) 0.012(11) -0.010(10) 0.009(11)

C26 0.020(12) 0.052(15) 0.034(12) 0.002(10) -0.001(9) 0.003(12)

C27 0.018(12) 0.029(12) 0.058(15) -0.009(11) 0.004(10) -0.004(11)

C28 0.09(3) 0.009(10) 0.064(18) -0.008(10) 0.014(16) -0.003(13)

C29 0.051(17) 0.047(15) 0.031(13) -0.011(11) 0.009(11) -0.010(14)

C31 0.036(13) 0.039(12) 0.017(10) 0.007(9) -0.014(9) -0.014(11)

C33 0.031(14) 0.036(13) 0.052(15) -0.007(11) 0.011(11) 0.003(12)

C35 0.039(16) 0.018(11) 0.11(3) -0.016(13) -0.053(17) 0.014(12)

C36 0.12(4) 0.032(15) 0.07(2) -0.011(14) -0.05(2) 0.01(2)

C37 0.09(3) 0.11(3) 0.16(4) -0.10(3) 0.09(3) -0.04(3)

C38 0.10(4) 0.17(5) 0.033(19) 0.00(2) 0.00(2) 0.01(3)

C39 0.11(4) 0.12(4) 0.09(3) -0.01(3) -0.01(3) -0.04(3)

C40 0.12(4) 0.06(2) 0.10(3) -0.02(2) -0.04(3) 0.05(3)

C41 0.09(4) 0.23(7) 0.13(4) 0.10(5) -0.04(3) -0.03(4)

Cu1 0.0211(14) 0.0327(15) 0.0494(17) -0.0072(12) -0.0097(12) 0.0012(13)

N1 0.028(11) 0.034(11) 0.050(12) 0.005(9) -0.001(9) -0.004(10)

N2 0.011(9) 0.046(12) 0.056(13) -0.011(9) -0.011(8) -0.005(9)

N3 0.030(11) 0.044(12) 0.037(11) -0.012(9) 0.006(8) -0.006(10)

N4 0.033(12) 0.030(10) 0.041(12) -0.010(8) 0.006(9) 0.002(10)

N5 0.024(10) 0.018(8) 0.038(10) -0.010(7) -0.017(7) 0.012(8)

N6 0.014(9) 0.015(8) 0.047(11) 0.002(7) -0.008(7) 0.008(8)

N7 0.038(14) 0.035(12) 0.087(18) 0.014(12) -0.014(12) -0.014(11)

N8 0.046(14) 0.063(15) 0.038(12) -0.009(10) -0.019(10) -0.001(12)

N9 0.036(12) 0.023(9) 0.069(14) -0.029(9) -0.013(10) 0.007(9)

N11 0.054(16) 0.068(16) 0.057(15) -0.024(12) -0.019(12) 0.007(14)

N12 0.09(2) 0.056(15) 0.038(12) -0.013(11) -0.030(12) -0.008(14)

N13 0.028(18) 0.07(2) 0.32(7) -0.06(3) -0.04(3) 0.000(19)

N14 0.22(7) 0.16(5) 0.19(6) 0.04(4) -0.07(5) -0.05(5)

N15 0.19(6) 0.23(6) 0.10(4) -0.05(4) -0.02(4) 0.06(5)

O1 0.049(11) 0.041(9) 0.060(11) -0.008(8) -0.011(8) -0.007(9)

O2 0.039(10) 0.026(8) 0.049(10) -0.003(7) -0.025(8) 0.001(8)

O3 0.017(8) 0.026(8) 0.077(12) -0.007(8) -0.023(8) 0.002(7)

O4 0.037(11) 0.023(8) 0.077(13) -0.006(8) -0.026(9) -0.002(8)

O5 0.039(11) 0.048(11) 0.053(11) -0.015(9) 0.017(8) 0.007(9)

O6 0.045(12) 0.029(9) 0.077(14) 0.003(9) -0.009(10) 0.001(9)

O7 0.10(2) 0.082(16) 0.060(14) -0.022(12) 0.017(13) -0.009(15)

O8 0.022(9) 0.057(12) 0.068(13) -0.015(9) 0.011(8) -0.005(9)

O9 0.068(17) 0.064(13) 0.064(14) -0.013(10) -0.008(11) -0.028(13)

O10 0.065(16) 0.094(17) 0.061(14) -0.014(12) 0.018(12) 0.008(14)

O11 0.038(10) 0.047(10) 0.047(10) -0.021(8) -0.024(8) 0.007(9)

Tb1 0.0241(6) 0.0271(6) 0.0412(7) -0.0073(5) -0.0078(5) 0.0016(5)

W1 0.0211(5) 0.0204(5) 0.0355(5) -0.0079(3) -0.0061(3) 0.0026(4)

 

_geom_special_details

;

 All esds (except the esd in the dihedral angle between two l.s. planes)

 are estimated using the full covariance matrix.  The cell esds are taken

 into account individually in the estimation of esds in distances, angles

 and torsion angles; correlations between esds in cell parameters are only

 used when they are defined by crystal symmetry.  An approximate (isotropic)

 treatment of cell esds is used for estimating esds involving l.s. planes.

;

 

loop_

 _geom_bond_atom_site_label_1

 _geom_bond_atom_site_label_2

 _geom_bond_distance

 _geom_bond_site_symmetry_2

 _geom_bond_publ_flag

C1 O1 1.46(3) . ?

C1 H1A 0.9600 . ?

C1 H1B 0.9600 . ?

C1 H1C 0.9600 . ?

C2 O1 1.35(3) . ?

C2 C3 1.36(4) . ?

C2 C7 1.45(3) . ?

C3 C4 1.41(4) . ?

C3 H3 0.9300 . ?

C4 C5 1.34(5) . ?

C4 H4 0.9300 . ?

C5 C6 1.41(3) . ?

C5 H5 0.9300 . ?

C6 C7 1.38(3) . ?

C6 C8 1.46(4) . ?

C7 O2 1.32(3) . ?

C8 N1 1.29(3) . ?

C8 H8 0.9300 . ?

C9 N1 1.48(3) . ?

C9 C10 1.51(4) . ?

C9 H9A 0.9700 . ?

C9 H9B 0.9700 . ?

C10 C11 1.47(4) . ?

C10 H10A 0.9700 . ?

C10 H10B 0.9700 . ?

C11 N2 1.51(3) . ?

C11 H11A 0.9700 . ?

C11 H11B 0.9700 . ?

C12 N2 1.30(3) . ?

C12 C13 1.44(4) . ?

C12 H12 0.9300 . ?

C13 C18 1.40(4) . ?

C13 C14 1.41(3) . ?

C14 C15 1.44(4) . ?

C14 H14 0.9300 . ?

C15 C16 1.41(4) . ?

C15 H15 0.9300 . ?

C16 C17 1.35(3) . ?

C16 H16 0.9300 . ?

C17 O4 1.35(3) . ?

C17 C18 1.44(3) . ?

C18 O3 1.30(2) . ?

C19 O4 1.49(3) . ?

C19 H19A 0.9600 . ?

C19 H19B 0.9600 . ?

C19 H19C 0.9600 . ?

C20 C21 1.33(3) . ?

C20 N5 1.35(3) . ?

C20 H20 0.9300 . ?

C21 C22 1.38(4) . ?

C21 H21 0.9300 . ?

C22 C23 1.38(4) . ?

C22 H22 0.9300 . ?

C23 C24 1.42(3) . ?

C23 H23 0.9300 . ?

C24 N5 1.32(3) . ?

C24 C25 1.41(3) . ?

C25 C26 1.35(3) . ?

C25 N6 1.41(3) . ?

C26 C27 1.40(4) . ?

C26 H26 0.9300 . ?

C27 C28 1.37(4) . ?

C27 H27 0.9300 . ?

C28 C29 1.39(4) . ?

C28 H28 0.9300 . ?

C29 N6 1.28(3) . ?

C29 H29 0.9300 . ?

C30 N7 1.13(3) . ?

C30 W1 2.20(2) . ?

C31 N8 1.14(3) . ?

C31 W1 2.16(2) . ?

C32 N9 1.15(3) . ?

C32 W1 2.15(2) . ?

C33 N10 1.16(4) . ?

C33 W1 2.12(3) . ?

C34 N11 1.18(3) . ?

C34 W1 2.107(19) . ?

C35 N12 1.19(4) . ?

C35 W1 2.07(3) . ?

C36 N13 1.13(6) . ?

C36 C37 1.50(5) . ?

C37 H37A 0.9600 . ?

C37 H37B 0.9600 . ?

C37 H37C 0.9600 . ?

C38 N14 1.10(7) . ?

C38 C39 1.29(6) . ?

C39 H39A 0.9600 . ?

C39 H39B 0.9600 . ?

C39 H39C 0.9600 . ?

C40 N15 1.11(6) . ?

C40 C41 1.38(6) . ?

C41 H41A 0.9600 . ?

C41 H41B 0.9600 . ?

C41 H41C 0.9600 . ?

Cu1 N1 1.97(2) . ?

Cu1 O3 1.980(14) . ?

Cu1 N2 1.99(2) . ?

Cu1 O2 1.996(17) . ?

Cu1 Tb1 3.454(3) . ?

N3 O7 1.23(3) . ?

N3 O5 1.24(3) . ?

N3 O6 1.27(3) . ?

N3 Tb1 2.839(19) . ?

N4 O10 1.20(3) . ?

N4 O9 1.23(3) . ?

N4 O8 1.27(3) . ?

N4 Tb1 2.872(19) . ?

N5 W1 2.226(17) . ?

N6 W1 2.271(15) . ?

O1 Tb1 2.452(18) . ?

O2 Tb1 2.288(15) . ?

O3 Tb1 2.338(16) . ?

O4 Tb1 2.498(15) . ?

O5 Tb1 2.413(16) . ?

O6 Tb1 2.468(19) . ?

O8 Tb1 2.394(17) . ?

O9 Tb1 2.43(2) . ?

O11 Tb1 2.363(16) . ?

 

loop_

 _geom_angle_atom_site_label_1

 _geom_angle_atom_site_label_2

 _geom_angle_atom_site_label_3

 _geom_angle

 _geom_angle_site_symmetry_1

 _geom_angle_site_symmetry_3

 _geom_angle_publ_flag

O1 C1 H1A 109.5 . . ?

O1 C1 H1B 109.5 . . ?

H1A C1 H1B 109.5 . . ?

O1 C1 H1C 109.5 . . ?

H1A C1 H1C 109.5 . . ?

H1B C1 H1C 109.5 . . ?

O1 C2 C3 130(3) . . ?

O1 C2 C7 110(2) . . ?

C3 C2 C7 120(2) . . ?

C2 C3 C4 122(3) . . ?

C2 C3 H3 119.1 . . ?

C4 C3 H3 119.1 . . ?

C5 C4 C3 118(3) . . ?

C5 C4 H4 121.0 . . ?

C3 C4 H4 121.0 . . ?

C4 C5 C6 123(3) . . ?

C4 C5 H5 118.7 . . ?

C6 C5 H5 118.7 . . ?

C7 C6 C5 120(3) . . ?

C7 C6 C8 122(2) . . ?

C5 C6 C8 118(2) . . ?

O2 C7 C6 125(2) . . ?

O2 C7 C2 118(2) . . ?

C6 C7 C2 117(2) . . ?

N1 C8 C6 128(2) . . ?

N1 C8 H8 116.0 . . ?

C6 C8 H8 116.0 . . ?

N1 C9 C10 110(2) . . ?

N1 C9 H9A 109.7 . . ?

C10 C9 H9A 109.7 . . ?

N1 C9 H9B 109.7 . . ?

C10 C9 H9B 109.7 . . ?

H9A C9 H9B 108.2 . . ?

C11 C10 C9 113(2) . . ?

C11 C10 H10A 108.9 . . ?

C9 C10 H10A 108.9 . . ?

C11 C10 H10B 108.9 . . ?

C9 C10 H10B 108.9 . . ?

H10A C10 H10B 107.7 . . ?

C10 C11 N2 113(2) . . ?

C10 C11 H11A 109.0 . . ?

N2 C11 H11A 109.0 . . ?

C10 C11 H11B 109.0 . . ?

N2 C11 H11B 109.0 . . ?

H11A C11 H11B 107.8 . . ?

N2 C12 C13 129(2) . . ?

N2 C12 H12 115.7 . . ?

C13 C12 H12 115.7 . . ?

C18 C13 C14 123(3) . . ?

C18 C13 C12 124(2) . . ?

C14 C13 C12 113(3) . . ?

C13 C14 C15 118(3) . . ?

C13 C14 H14 121.2 . . ?

C15 C14 H14 121.2 . . ?

C16 C15 C14 120(3) . . ?

C16 C15 H15 120.2 . . ?

C14 C15 H15 120.2 . . ?

C17 C16 C15 121(3) . . ?

C17 C16 H16 119.5 . . ?

C15 C16 H16 119.5 . . ?

C16 C17 O4 128(3) . . ?

C16 C17 C18 122(3) . . ?

O4 C17 C18 110.2(19) . . ?

O3 C18 C13 124(2) . . ?

O3 C18 C17 119(2) . . ?

C13 C18 C17 117(2) . . ?

O4 C19 H19A 109.5 . . ?

O4 C19 H19B 109.5 . . ?

H19A C19 H19B 109.5 . . ?

O4 C19 H19C 109.5 . . ?

H19A C19 H19C 109.5 . . ?

H19B C19 H19C 109.5 . . ?

C21 C20 N5 126(2) . . ?

C21 C20 H20 116.8 . . ?

N5 C20 H20 116.8 . . ?

C20 C21 C22 116(3) . . ?

C20 C21 H21 122.0 . . ?

C22 C21 H21 122.0 . . ?

C21 C22 C23 121(2) . . ?

C21 C22 H22 119.6 . . ?

C23 C22 H22 119.6 . . ?

C22 C23 C24 118(2) . . ?

C22 C23 H23 120.8 . . ?

C24 C23 H23 120.8 . . ?

N5 C24 C25 119.2(19) . . ?

N5 C24 C23 120(2) . . ?

C25 C24 C23 121(2) . . ?

C26 C25 N6 115(2) . . ?

C26 C25 C24 129(2) . . ?

N6 C25 C24 116.0(19) . . ?

C25 C26 C27 125(2) . . ?

C25 C26 H26 117.7 . . ?

C27 C26 H26 117.7 . . ?

C28 C27 C26 117(2) . . ?

C28 C27 H27 121.5 . . ?

C26 C27 H27 121.5 . . ?

C27 C28 C29 118(3) . . ?

C27 C28 H28 121.0 . . ?

C29 C28 H28 121.0 . . ?

N6 C29 C28 124(3) . . ?

N6 C29 H29 118.2 . . ?

C28 C29 H29 118.2 . . ?

N7 C30 W1 171(2) . . ?

N8 C31 W1 176(2) . . ?

N9 C32 W1 177(2) . . ?

N10 C33 W1 176(2) . . ?

N11 C34 W1 172.8(19) . . ?

N12 C35 W1 175(3) . . ?

N13 C36 C37 166(5) . . ?

C36 C37 H37A 109.5 . . ?

C36 C37 H37B 109.5 . . ?

H37A C37 H37B 109.5 . . ?

C36 C37 H37C 109.5 . . ?

H37A C37 H37C 109.5 . . ?

H37B C37 H37C 109.5 . . ?

N14 C38 C39 170(8) . . ?

C38 C39 H39A 109.5 . . ?

C38 C39 H39B 109.5 . . ?

H39A C39 H39B 109.5 . . ?

C38 C39 H39C 109.5 . . ?

H39A C39 H39C 109.5 . . ?

H39B C39 H39C 109.5 . . ?

N15 C40 C41 171(7) . . ?

C40 C41 H41A 109.5 . . ?

C40 C41 H41B 109.5 . . ?

H41A C41 H41B 109.5 . . ?

C40 C41 H41C 109.5 . . ?

H41A C41 H41C 109.5 . . ?

H41B C41 H41C 109.5 . . ?

N1 Cu1 O3 170.2(8) . . ?

N1 Cu1 N2 96.9(9) . . ?

O3 Cu1 N2 92.4(7) . . ?

N1 Cu1 O2 91.5(8) . . ?

O3 Cu1 O2 78.7(6) . . ?

N2 Cu1 O2 159.0(8) . . ?

N1 Cu1 Tb1 129.7(7) . . ?

O3 Cu1 Tb1 40.6(5) . . ?

N2 Cu1 Tb1 132.5(5) . . ?

O2 Cu1 Tb1 39.2(4) . . ?

C8 N1 C9 116(2) . . ?

C8 N1 Cu1 125.3(17) . . ?

C9 N1 Cu1 118.3(16) . . ?

C12 N2 C11 116(2) . . ?

C12 N2 Cu1 122.6(17) . . ?

C11 N2 Cu1 121.4(17) . . ?

O7 N3 O5 121(2) . . ?

O7 N3 O6 121(2) . . ?

O5 N3 O6 117.4(19) . . ?

O7 N3 Tb1 171.1(19) . . ?

O5 N3 Tb1 57.6(11) . . ?

O6 N3 Tb1 60.2(12) . . ?

O10 N4 O9 126(3) . . ?

O10 N4 O8 122(2) . . ?

O9 N4 O8 112.1(19) . . ?

O10 N4 Tb1 175.3(18) . . ?

O9 N4 Tb1 56.8(13) . . ?

O8 N4 Tb1 55.5(11) . . ?

C24 N5 C20 118.0(18) . . ?

C24 N5 W1 116.8(14) . . ?

C20 N5 W1 124.8(13) . . ?

C29 N6 C25 122(2) . . ?

C29 N6 W1 124.3(17) . . ?

C25 N6 W1 114.0(15) . . ?

C2 O1 C1 115(2) . . ?

C2 O1 Tb1 121.7(16) . . ?

C1 O1 Tb1 122.8(16) . . ?

C7 O2 Cu1 127.6(15) . . ?

C7 O2 Tb1 124.5(15) . . ?

Cu1 O2 Tb1 107.2(6) . . ?

C18 O3 Cu1 127.5(15) . . ?

C18 O3 Tb1 122.9(14) . . ?

Cu1 O3 Tb1 105.9(7) . . ?

C17 O4 C19 117(2) . . ?

C17 O4 Tb1 119.6(14) . . ?

C19 O4 Tb1 121.8(17) . . ?

N3 O5 Tb1 96.8(13) . . ?

N3 O6 Tb1 93.1(13) . . ?

N4 O8 Tb1 98.5(14) . . ?

N4 O9 Tb1 98.2(16) . . ?

O2 Tb1 O3 66.1(5) . . ?

O2 Tb1 O11 139.0(6) . . ?

O3 Tb1 O11 148.0(6) . . ?

O2 Tb1 O8 121.0(7) . . ?

O3 Tb1 O8 117.0(7) . . ?

O11 Tb1 O8 71.4(7) . . ?

O2 Tb1 O5 75.0(6) . . ?

O3 Tb1 O5 105.0(7) . . ?

O11 Tb1 O5 73.2(6) . . ?

O8 Tb1 O5 138.0(7) . . ?

O2 Tb1 O9 78.6(7) . . ?

O3 Tb1 O9 75.4(7) . . ?

O11 Tb1 O9 122.1(7) . . ?

O8 Tb1 O9 50.9(8) . . ?

O5 Tb1 O9 150.5(7) . . ?

O2 Tb1 O1 64.6(6) . . ?

O3 Tb1 O1 129.3(6) . . ?

O11 Tb1 O1 81.5(6) . . ?

O8 Tb1 O1 80.4(7) . . ?

O5 Tb1 O1 72.6(6) . . ?

O9 Tb1 O1 84.4(7) . . ?

O2 Tb1 O6 105.4(6) . . ?

O3 Tb1 O6 80.0(7) . . ?

O11 Tb1 O6 74.0(7) . . ?

O8 Tb1 O6 133.6(7) . . ?

O5 Tb1 O6 52.2(6) . . ?

O9 Tb1 O6 150.9(7) . . ?

O1 Tb1 O6 123.7(6) . . ?

O2 Tb1 O4 128.0(6) . . ?

O3 Tb1 O4 63.5(5) . . ?

O11 Tb1 O4 92.5(6) . . ?

O8 Tb1 O4 73.9(6) . . ?

O5 Tb1 O4 129.8(6) . . ?

O9 Tb1 O4 77.6(7) . . ?

O1 Tb1 O4 154.2(7) . . ?

O6 Tb1 O4 77.7(6) . . ?

O2 Tb1 N3 91.4(6) . . ?

O3 Tb1 N3 94.5(6) . . ?

O11 Tb1 N3 69.9(6) . . ?

O8 Tb1 N3 141.1(7) . . ?

O5 Tb1 N3 25.7(6) . . ?

O9 Tb1 N3 167.9(7) . . ?

O1 Tb1 N3 97.3(6) . . ?

O6 Tb1 N3 26.6(6) . . ?

O4 Tb1 N3 104.1(6) . . ?

O2 Tb1 N4 100.4(6) . . ?

O3 Tb1 N4 95.3(6) . . ?

O11 Tb1 N4 97.3(6) . . ?

O8 Tb1 N4 26.0(7) . . ?

O5 Tb1 N4 154.6(6) . . ?

O9 Tb1 N4 25.0(7) . . ?

O1 Tb1 N4 82.9(6) . . ?

O6 Tb1 N4 149.0(6) . . ?

O4 Tb1 N4 73.0(6) . . ?

N3 Tb1 N4 167.0(6) . . ?

O2 Tb1 Cu1 33.5(4) . . ?

O3 Tb1 Cu1 33.4(3) . . ?

O11 Tb1 Cu1 157.4(4) . . ?

O8 Tb1 Cu1 131.1(5) . . ?

O5 Tb1 Cu1 85.0(5) . . ?

O9 Tb1 Cu1 80.2(6) . . ?

O1 Tb1 Cu1 98.1(5) . . ?

O6 Tb1 Cu1 87.9(5) . . ?

O4 Tb1 Cu1 96.9(4) . . ?

N3 Tb1 Cu1 87.8(4) . . ?

N4 Tb1 Cu1 105.1(5) . . ?

C35 W1 C34 139.4(10) . . ?

C35 W1 C33 82.2(11) . . ?

C34 W1 C33 71.4(9) . . ?

C35 W1 C32 144.4(9) . . ?

C34 W1 C32 72.8(7) . . ?

C33 W1 C32 101.9(9) . . ?

C35 W1 C31 76.2(9) . . ?

C34 W1 C31 119.7(8) . . ?

C33 W1 C31 69.6(9) . . ?

C32 W1 C31 72.5(8) . . ?

C35 W1 C30 75.4(11) . . ?

C34 W1 C30 142.5(9) . . ?

C33 W1 C30 141.3(10) . . ?

C32 W1 C30 80.5(8) . . ?

C31 W1 C30 74.6(9) . . ?

C35 W1 N5 113.5(8) . . ?

C34 W1 N5 76.4(7) . . ?

C33 W1 N5 143.4(9) . . ?

C32 W1 N5 84.4(7) . . ?

C31 W1 N5 144.4(8) . . ?

C30 W1 N5 75.2(8) . . ?

C35 W1 N6 70.0(8) . . ?

C34 W1 N6 76.5(7) . . ?

C33 W1 N6 82.7(8) . . ?

C32 W1 N6 145.4(7) . . ?

C31 W1 N6 138.6(8) . . ?

C30 W1 N6 117.2(8) . . ?

N5 W1 N6 73.2(6) . . ?

 

_diffrn_measured_fraction_theta_max    0.907

_diffrn_reflns_theta_full              25.23

_diffrn_measured_fraction_theta_full   0.907

_refine_diff_density_max    4.438

_refine_diff_density_min   -2.146

_refine_diff_density_rms    0.292

#===end


data_C3

 

_audit_creation_method            SHELXL-97

_chemical_name_systematic

;

 ?

;

_chemical_name_common             ?

_chemical_melting_point           ?

_chemical_formula_moiety          ?

_chemical_formula_sum

 'C41 H39 Cu Ho N15 O11 W'

_chemical_formula_weight          1330.19

 

loop_

 _atom_type_symbol

 _atom_type_description

 _atom_type_scat_dispersion_real

 _atom_type_scat_dispersion_imag

 _atom_type_scat_source

 'C'  'C'   0.0033   0.0016

 'International Tables Vol C Tables 4.2.6.8 and 6.1.1.4'

 'H'  'H'   0.0000   0.0000

 'International Tables Vol C Tables 4.2.6.8 and 6.1.1.4'

 'Cu'  'Cu'   0.3201   1.2651

 'International Tables Vol C Tables 4.2.6.8 and 6.1.1.4'

 'Ho'  'Ho'  -0.2175   4.6783

 'International Tables Vol C Tables 4.2.6.8 and 6.1.1.4'

 'N'  'N'   0.0061   0.0033

 'International Tables Vol C Tables 4.2.6.8 and 6.1.1.4'

 'O'  'O'   0.0106   0.0060

 'International Tables Vol C Tables 4.2.6.8 and 6.1.1.4'

 'W'  'W'  -0.8490   6.8722

 'International Tables Vol C Tables 4.2.6.8 and 6.1.1.4'

 

_symmetry_cell_setting            Triclinic

_symmetry_space_group_name_H-M    P-1

 

loop_

 _symmetry_equiv_pos_as_xyz

 'x, y, z'

 '-x, -y, -z'

 

_cell_length_a                    11.8603(9)

_cell_length_b                    14.0131(10)

_cell_length_c                    14.8680(14)

_cell_angle_alpha                 79.165(7)

_cell_angle_beta                  82.352(7)

_cell_angle_gamma                 85.570(6)

_cell_volume                      2401.9(3)

_cell_formula_units_Z             2

_cell_measurement_temperature     293(2)

_cell_measurement_reflns_used     17923

_cell_measurement_theta_min       2.34

_cell_measurement_theta_max       29.31

 

_exptl_crystal_description        prism

_exptl_crystal_colour             brown

_exptl_crystal_size_max           0.4

_exptl_crystal_size_mid           0.2

_exptl_crystal_size_min           0.1

_exptl_crystal_density_meas       'not measured'

_exptl_crystal_density_diffrn     1.839

_exptl_crystal_density_method     'not measured'

_exptl_crystal_F_000              1296

_exptl_absorpt_coefficient_mu     4.532

_exptl_absorpt_correction_type    multi-scan

_exptl_absorpt_correction_T_min   0.2321

_exptl_absorpt_correction_T_max   0.4623

_exptl_absorpt_process_details

;

[c.f. r.h. blessing, acta cryst. (1995), a51, 33-38]

;

_exptl_special_details

;

 ?

;

 

_diffrn_ambient_temperature       293(2)

_diffrn_radiation_wavelength      0.71073

_diffrn_radiation_type            MoK\a

_diffrn_radiation_source          'fine-focus sealed tube'

_diffrn_radiation_monochromator   graphite

_diffrn_measurement_device_type   'STOE IPDS II'

_diffrn_measurement_method        'omega scans'

_diffrn_detector_area_resol_mean  ?

_diffrn_standards_number          ?

_diffrn_standards_interval_count  ?

_diffrn_standards_interval_time   ?

_diffrn_standards_decay_%         ?

_diffrn_reflns_number             25573

_diffrn_reflns_av_R_equivalents   0.0663

_diffrn_reflns_av_sigmaI/netI     0.0726

_diffrn_reflns_limit_h_min        -16

_diffrn_reflns_limit_h_max        16

_diffrn_reflns_limit_k_min        -19

_diffrn_reflns_limit_k_max        18

_diffrn_reflns_limit_l_min        -20

_diffrn_reflns_limit_l_max        20

_diffrn_reflns_theta_min          2.34

_diffrn_reflns_theta_max          29.31

_reflns_number_total              11799

_reflns_number_gt                 8410

_reflns_threshold_expression      >2sigma(I)

 

_computing_data_collection        'X-Area'

_computing_cell_refinement        'X-Area'

_computing_data_reduction         'X-Area'

_computing_structure_solution     'SHELXS-97 (Sheldrick, 1997)'

_computing_structure_refinement   'SHELXL-97 (Sheldrick, 1997)'

_computing_molecular_graphics     ?

_computing_publication_material   ?

 

_refine_special_details

;

 Refinement of F^2^ against ALL reflections.  The weighted R-factor wR and

 goodness of fit S are based on F^2^, conventional R-factors R are based

 on F, with F set to zero for negative F^2^. The threshold expression of

 F^2^ > 2sigma(F^2^) is used only for calculating R-factors(gt) etc. and is

 not relevant to the choice of reflections for refinement.  R-factors based

 on F^2^ are statistically about twice as large as those based on F, and R-

 factors based on ALL data will be even larger.

;

 

_refine_ls_structure_factor_coef  Fsqd

_refine_ls_matrix_type            full

_refine_ls_weighting_scheme       calc

_refine_ls_weighting_details

 'calc w=1/[\s^2^(Fo^2^)+(0.0675P)^2^+5.1678P] where P=(Fo^2^+2Fc^2^)/3'

_atom_sites_solution_primary      direct

_atom_sites_solution_secondary    difmap

_atom_sites_solution_hydrogens    geom

_refine_ls_hydrogen_treatment     constr

_refine_ls_extinction_method      SHELXL

_refine_ls_extinction_coef        0.0017(2)

_refine_ls_extinction_expression

 'Fc^*^=kFc[1+0.001xFc^2^\l^3^/sin(2\q)]^-1/4^'

_refine_ls_number_reflns          11799

_refine_ls_number_parameters      635

_refine_ls_number_restraints      0

_refine_ls_R_factor_all           0.0874

_refine_ls_R_factor_gt            0.0576

_refine_ls_wR_factor_ref          0.1387

_refine_ls_wR_factor_gt           0.1263

_refine_ls_goodness_of_fit_ref    1.020

_refine_ls_restrained_S_all       1.020

_refine_ls_shift/su_max           0.003

_refine_ls_shift/su_mean          0.000

 

loop_

 _atom_site_label

 _atom_site_type_symbol

 _atom_site_fract_x

 _atom_site_fract_y

 _atom_site_fract_z

 _atom_site_U_iso_or_equiv

 _atom_site_adp_type

 _atom_site_occupancy

 _atom_site_symmetry_multiplicity

 _atom_site_calc_flag

 _atom_site_refinement_flags

 _atom_site_disorder_assembly

 _atom_site_disorder_group

C1 C 0.1423(9) -0.1422(8) 0.8411(8) 0.058(3) Uani 1 1 d . . .

H1A H 0.0814 -0.0973 0.8214 0.087 Uiso 1 1 calc R . .

H1B H 0.1212 -0.1744 0.9034 0.087 Uiso 1 1 calc R . .

H1C H 0.1569 -0.1896 0.8015 0.087 Uiso 1 1 calc R . .

C2 C 0.3425(7) -0.1453(6) 0.8601(6) 0.0379(18) Uani 1 1 d . . .

C3 C 0.3472(8) -0.2455(7) 0.8869(7) 0.047(2) Uani 1 1 d . . .

H3 H 0.2832 -0.2808 0.8896 0.057 Uiso 1 1 calc R . .

C4 C 0.4509(10) -0.2923(7) 0.9100(7) 0.056(3) Uani 1 1 d . . .

H4 H 0.4563 -0.3597 0.9273 0.068 Uiso 1 1 calc R . .

C5 C 0.5432(9) -0.2404(7) 0.9073(7) 0.050(2) Uani 1 1 d . . .

H5 H 0.6109 -0.2727 0.9238 0.060 Uiso 1 1 calc R . .

C6 C 0.5390(8) -0.1381(7) 0.8800(6) 0.042(2) Uani 1 1 d . . .

C7 C 0.4356(8) -0.0904(6) 0.8569(6) 0.0397(19) Uani 1 1 d . . .

C8 C 0.6413(8) -0.0884(7) 0.8738(6) 0.045(2) Uani 1 1 d . . .

H8 H 0.7052 -0.1274 0.8898 0.054 Uiso 1 1 calc R . .

C9 C 0.7721(8) 0.0344(8) 0.8438(7) 0.054(3) Uani 1 1 d . . .

H9A H 0.7989 0.0607 0.7801 0.065 Uiso 1 1 calc R . .

H9B H 0.8218 -0.0217 0.8638 0.065 Uiso 1 1 calc R . .

C10 C 0.7801(8) 0.1106(8) 0.9025(7) 0.053(2) Uani 1 1 d . . .

H10A H 0.7369 0.0913 0.9625 0.064 Uiso 1 1 calc R . .

H10B H 0.8590 0.1142 0.9116 0.064 Uiso 1 1 calc R . .

C11 C 0.7354(8) 0.2090(7) 0.8590(8) 0.052(2) Uani 1 1 d . . .

H11A H 0.7497 0.2561 0.8958 0.063 Uiso 1 1 calc R . .

H11B H 0.7773 0.2270 0.7983 0.063 Uiso 1 1 calc R . .

C12 C 0.5610(8) 0.2971(7) 0.8587(6) 0.0418(19) Uani 1 1 d . . .

H12 H 0.6046 0.3419 0.8754 0.050 Uiso 1 1 calc R . .

C13 C 0.4439(7) 0.3291(6) 0.8456(6) 0.0371(17) Uani 1 1 d . . .

C14 C 0.4088(8) 0.4235(7) 0.8627(8) 0.053(2) Uani 1 1 d . . .

H14 H 0.4579 0.4604 0.8841 0.063 Uiso 1 1 calc R . .

C15 C 0.3002(9) 0.4599(7) 0.8470(8) 0.055(3) Uani 1 1 d . . .

H15 H 0.2754 0.5211 0.8596 0.066 Uiso 1 1 calc R . .

C16 C 0.2279(8) 0.4068(7) 0.8127(7) 0.047(2) Uani 1 1 d . . .

H16 H 0.1561 0.4335 0.8004 0.057 Uiso 1 1 calc R . .

C17 C 0.2608(7) 0.3157(6) 0.7970(6) 0.0358(17) Uani 1 1 d . . .

C18 C 0.3704(7) 0.2745(6) 0.8131(5) 0.0339(16) Uani 1 1 d . . .

C19 C 0.0854(8) 0.2946(7) 0.7381(9) 0.062(3) Uani 1 1 d . . .

H19A H 0.0489 0.2468 0.7153 0.093 Uiso 1 1 calc R . .

H19B H 0.0944 0.3518 0.6912 0.093 Uiso 1 1 calc R . .

H19C H 0.0395 0.3113 0.7917 0.093 Uiso 1 1 calc R . .

C20 C 0.5758(7) 0.2082(7) 0.4069(6) 0.0403(19) Uani 1 1 d . . .

H20 H 0.6067 0.1484 0.4342 0.048 Uiso 1 1 calc R . .

C21 C 0.4894(7) 0.2103(7) 0.3531(6) 0.045(2) Uani 1 1 d . . .

H21 H 0.4655 0.1526 0.3415 0.054 Uiso 1 1 calc R . .

C22 C 0.4388(7) 0.2977(8) 0.3166(7) 0.049(2) Uani 1 1 d . . .

H22 H 0.3795 0.2998 0.2810 0.059 Uiso 1 1 calc R . .

C23 C 0.4766(7) 0.3824(7) 0.3332(6) 0.042(2) Uani 1 1 d . . .

H23 H 0.4426 0.4424 0.3099 0.050 Uiso 1 1 calc R . .

C24 C 0.5660(6) 0.3767(6) 0.3854(5) 0.0313(15) Uani 1 1 d . . .

C25 C 0.6128(6) 0.4625(6) 0.4071(5) 0.0325(16) Uani 1 1 d . . .

C26 C 0.5633(7) 0.5555(6) 0.3864(6) 0.042(2) Uani 1 1 d . . .

H26 H 0.4975 0.5652 0.3573 0.050 Uiso 1 1 calc R . .

C27 C 0.6104(8) 0.6343(6) 0.4086(7) 0.046(2) Uani 1 1 d . . .

H27 H 0.5775 0.6970 0.3949 0.055 Uiso 1 1 calc R . .

C28 C 0.7083(8) 0.6162(6) 0.4519(6) 0.045(2) Uani 1 1 d . . .

H28 H 0.7429 0.6675 0.4669 0.054 Uiso 1 1 calc R . .

C29 C 0.7540(8) 0.5239(6) 0.4724(6) 0.0408(19) Uani 1 1 d . . .

H29 H 0.8191 0.5133 0.5023 0.049 Uiso 1 1 calc R . .

C30 C 0.6610(7) 0.1954(6) 0.5919(6) 0.0382(18) Uani 1 1 d . . .

C31 C 0.8712(7) 0.2046(6) 0.5872(6) 0.0399(18) Uani 1 1 d . . .

C32 C 0.8193(7) 0.1600(7) 0.4426(6) 0.0401(19) Uani 1 1 d . . .

C33 C 0.9315(8) 0.3552(7) 0.4828(7) 0.047(2) Uani 1 1 d . . .

C34 C 0.8313(7) 0.3294(6) 0.3466(6) 0.0389(18) Uani 1 1 d . . .

C35 C 0.7359(7) 0.3552(6) 0.6157(6) 0.0377(18) Uani 1 1 d . . .

C36 C 0.7631(13) 0.5318(10) 0.8213(12) 0.078(4) Uani 1 1 d . . .

C37 C 0.8699(14) 0.5341(14) 0.7552(12) 0.105(5) Uani 1 1 d . . .

H37A H 0.8792 0.4757 0.7294 0.158 Uiso 1 1 calc R . .

H37B H 0.9340 0.5387 0.7871 0.158 Uiso 1 1 calc R . .

H37C H 0.8651 0.5895 0.7065 0.158 Uiso 1 1 calc R . .

C38 C 0.9932(19) 0.3548(15) 1.0009(13) 0.109(6) Uani 1 1 d . . .

C39 C 1.0847(18) 0.3400(18) 1.0595(13) 0.145(9) Uani 1 1 d . . .

H39A H 1.1550 0.3237 1.0242 0.218 Uiso 1 1 calc R . .

H39B H 1.0674 0.2880 1.1104 0.218 Uiso 1 1 calc R . .

H39C H 1.0920 0.3987 1.0823 0.218 Uiso 1 1 calc R . .

C40 C 0.8403(14) 0.8389(13) 0.6752(14) 0.096(5) Uani 1 1 d . . .

C41 C 0.8572(17) 0.8923(19) 0.5847(16) 0.181(13) Uani 1 1 d . . .

H41A H 0.8297 0.9585 0.5845 0.272 Uiso 1 1 calc R . .

H41B H 0.8165 0.8642 0.5453 0.272 Uiso 1 1 calc R . .

H41C H 0.9370 0.8904 0.5626 0.272 Uiso 1 1 calc R . .

Cu1 Cu 0.53582(8) 0.10474(8) 0.82115(7) 0.0376(2) Uani 1 1 d . . .

N1 N 0.6565(6) 0.0031(5) 0.8490(5) 0.0398(16) Uani 1 1 d . . .

N2 N 0.6116(6) 0.2145(6) 0.8499(5) 0.0391(16) Uani 1 1 d . . .

N3 N 0.3588(7) 0.0678(6) 0.5908(5) 0.0476(19) Uani 1 1 d . . .

N4 N 0.1164(8) 0.0987(7) 0.9384(6) 0.055(2) Uani 1 1 d . . .

N5 N 0.6173(5) 0.2915(5) 0.4212(4) 0.0318(13) Uani 1 1 d . . .

N6 N 0.7083(5) 0.4470(4) 0.4511(4) 0.0304(13) Uani 1 1 d . . .

N7 N 0.6055(7) 0.1465(6) 0.6479(6) 0.053(2) Uani 1 1 d . . .

N8 N 0.9268(7) 0.1569(6) 0.6391(6) 0.053(2) Uani 1 1 d . . .

N9 N 0.8461(7) 0.0888(6) 0.4160(6) 0.053(2) Uani 1 1 d . . .

N10 N 1.0189(7) 0.3849(7) 0.4774(8) 0.065(3) Uani 1 1 d . . .

N11 N 0.8584(8) 0.3513(6) 0.2693(6) 0.058(2) Uani 1 1 d . . .

N12 N 0.7116(8) 0.3922(7) 0.6787(6) 0.059(2) Uani 1 1 d . . .

N13 N 0.6796(12) 0.5318(9) 0.8709(13) 0.110(5) Uani 1 1 d . . .

N14 N 0.924(2) 0.3660(18) 0.9557(18) 0.180(10) Uani 1 1 d . . .

N15 N 0.8272(18) 0.7912(15) 0.7427(14) 0.160(8) Uani 1 1 d . . .

O1 O 0.2443(5) -0.0898(4) 0.8369(5) 0.0446(15) Uani 1 1 d . . .

O2 O 0.4243(5) 0.0068(4) 0.8318(4) 0.0400(13) Uani 1 1 d . . .

O3 O 0.3982(4) 0.1856(4) 0.7951(4) 0.0377(13) Uani 1 1 d . . .

O4 O 0.1959(5) 0.2556(4) 0.7622(4) 0.0420(14) Uani 1 1 d . . .

O5 O 0.3557(5) -0.0030(4) 0.6575(4) 0.0445(14) Uani 1 1 d . . .

O6 O 0.3264(7) 0.1515(5) 0.6139(5) 0.0555(18) Uani 1 1 d . . .

O7 O 0.3866(8) 0.0585(7) 0.5126(5) 0.077(2) Uani 1 1 d . . .

O8 O 0.0815(6) 0.0852(5) 0.8664(5) 0.0513(16) Uani 1 1 d . . .

O9 O 0.2238(6) 0.1012(5) 0.9360(5) 0.0537(17) Uani 1 1 d . . .

O10 O 0.0545(7) 0.1126(7) 1.0062(5) 0.080(3) Uani 1 1 d . . .

O11 O 0.1217(5) 0.0527(5) 0.6898(5) 0.0487(16) Uani 1 1 d . . .

Ho1 Ho 0.26390(3) 0.08288(3) 0.77433(2) 0.03303(11) Uani 1 1 d . . .

W1 W 0.76954(2) 0.29322(2) 0.49175(2) 0.02945(9) Uani 1 1 d . . .

 

loop_

 _atom_site_aniso_label

 _atom_site_aniso_U_11

 _atom_site_aniso_U_22

 _atom_site_aniso_U_33

 _atom_site_aniso_U_23

 _atom_site_aniso_U_13

 _atom_site_aniso_U_12

C1 0.047(6) 0.042(6) 0.085(8) -0.012(5) -0.004(5) -0.008(4)

C2 0.040(5) 0.032(4) 0.040(4) -0.008(3) -0.001(3) 0.008(3)

C3 0.045(5) 0.034(5) 0.060(6) -0.003(4) -0.001(4) -0.003(4)

C4 0.071(7) 0.029(5) 0.064(6) 0.001(4) -0.006(5) 0.008(5)

C5 0.052(6) 0.034(5) 0.062(6) -0.004(4) -0.014(4) 0.012(4)

C6 0.043(5) 0.039(5) 0.041(4) -0.007(3) -0.006(3) 0.010(4)

C7 0.042(5) 0.037(5) 0.039(4) -0.007(3) -0.007(3) 0.008(4)

C8 0.042(5) 0.042(5) 0.048(5) -0.004(4) -0.017(4) 0.013(4)

C9 0.038(5) 0.059(7) 0.063(6) -0.006(5) -0.009(4) 0.007(4)

C10 0.033(5) 0.068(7) 0.060(6) -0.008(5) -0.019(4) 0.006(4)

C11 0.039(5) 0.045(6) 0.076(7) -0.009(5) -0.023(4) -0.004(4)

C12 0.041(5) 0.042(5) 0.044(5) -0.009(4) -0.010(3) -0.001(4)

C13 0.043(5) 0.024(4) 0.046(4) -0.005(3) -0.010(3) -0.003(3)

C14 0.044(5) 0.044(6) 0.078(7) -0.025(5) -0.021(5) 0.003(4)

C15 0.053(6) 0.027(5) 0.093(8) -0.027(5) -0.015(5) 0.004(4)

C16 0.043(5) 0.035(5) 0.068(6) -0.017(4) -0.012(4) 0.006(4)

C17 0.035(4) 0.028(4) 0.048(4) -0.012(3) -0.012(3) 0.003(3)

C18 0.039(4) 0.025(4) 0.038(4) -0.005(3) -0.006(3) -0.002(3)

C19 0.039(5) 0.039(6) 0.116(9) -0.028(5) -0.033(5) 0.019(4)

C20 0.025(4) 0.043(5) 0.052(5) -0.003(4) -0.009(3) -0.005(3)

C21 0.037(5) 0.051(6) 0.052(5) -0.011(4) -0.013(4) -0.015(4)

C22 0.029(4) 0.063(6) 0.058(5) -0.012(5) -0.020(4) -0.003(4)

C23 0.039(5) 0.043(5) 0.046(5) -0.004(4) -0.021(4) 0.005(4)

C24 0.028(4) 0.029(4) 0.036(4) -0.001(3) -0.005(3) -0.002(3)

C25 0.028(4) 0.035(4) 0.033(4) -0.002(3) -0.004(3) 0.003(3)

C26 0.037(4) 0.033(5) 0.049(5) 0.002(3) -0.006(3) 0.009(3)

C27 0.054(6) 0.022(4) 0.056(5) -0.001(3) 0.002(4) 0.009(4)

C28 0.056(6) 0.025(4) 0.055(5) -0.012(4) -0.002(4) -0.005(4)

C29 0.047(5) 0.027(4) 0.050(5) -0.008(3) -0.012(4) 0.000(3)

C30 0.036(4) 0.036(5) 0.045(5) -0.012(3) -0.011(3) 0.004(3)

C31 0.032(4) 0.034(5) 0.055(5) -0.009(4) -0.012(3) 0.003(3)

C32 0.038(4) 0.043(5) 0.042(4) -0.010(3) -0.015(3) 0.007(4)

C33 0.031(5) 0.045(5) 0.066(6) -0.008(4) -0.011(4) -0.008(4)

C34 0.034(4) 0.037(5) 0.048(5) -0.014(4) -0.006(3) 0.002(3)

C35 0.043(5) 0.025(4) 0.051(5) -0.019(3) -0.007(3) -0.003(3)

C36 0.057(8) 0.061(8) 0.124(12) -0.014(8) -0.032(8) -0.010(6)

C37 0.092(12) 0.127(15) 0.106(12) -0.039(11) -0.006(9) -0.020(10)

C38 0.121(16) 0.113(15) 0.087(12) 0.000(10) -0.003(10) -0.029(13)

C39 0.148(18) 0.20(2) 0.102(14) -0.023(14) -0.046(13) -0.073(17)

C40 0.089(11) 0.081(11) 0.110(13) -0.004(9) -0.007(9) 0.009(8)

C41 0.101(15) 0.24(3) 0.15(2) 0.11(2) -0.044(13) -0.029(16)

Cu1 0.0296(5) 0.0338(5) 0.0507(6) -0.0070(4) -0.0130(4) 0.0038(4)

N1 0.030(4) 0.043(4) 0.047(4) -0.006(3) -0.010(3) 0.001(3)

N2 0.031(4) 0.046(4) 0.042(4) -0.009(3) -0.012(3) -0.002(3)

N3 0.041(4) 0.056(5) 0.045(4) -0.010(4) -0.001(3) -0.010(4)

N4 0.049(5) 0.055(5) 0.055(5) -0.002(4) 0.003(4) 0.010(4)

N5 0.033(3) 0.029(3) 0.032(3) -0.004(2) -0.007(2) -0.002(3)

N6 0.030(3) 0.023(3) 0.039(3) -0.005(2) -0.009(2) 0.001(2)

N7 0.046(5) 0.055(5) 0.054(5) -0.003(4) -0.002(4) -0.003(4)

N8 0.044(5) 0.047(5) 0.071(5) -0.010(4) -0.023(4) 0.009(4)

N9 0.057(5) 0.046(5) 0.063(5) -0.026(4) -0.020(4) 0.011(4)

N10 0.039(5) 0.055(6) 0.108(8) -0.024(5) -0.014(5) -0.009(4)

N11 0.066(6) 0.046(5) 0.058(5) -0.007(4) 0.002(4) 0.001(4)

N12 0.070(6) 0.059(6) 0.049(5) -0.015(4) -0.010(4) 0.005(4)

N13 0.078(9) 0.063(8) 0.213(17) -0.069(9) -0.046(10) -0.004(7)

N14 0.17(2) 0.17(2) 0.20(2) 0.014(18) -0.053(17) -0.030(16)

N15 0.20(2) 0.141(16) 0.116(14) -0.001(12) 0.018(13) 0.042(14)

O1 0.033(3) 0.034(3) 0.065(4) -0.006(3) -0.007(3) 0.000(2)

O2 0.031(3) 0.028(3) 0.060(4) -0.001(2) -0.015(2) 0.002(2)

O3 0.026(3) 0.030(3) 0.060(4) -0.014(2) -0.013(2) 0.007(2)

O4 0.036(3) 0.034(3) 0.060(4) -0.015(3) -0.016(3) 0.006(2)

O5 0.042(3) 0.033(3) 0.056(4) -0.007(3) -0.005(3) 0.006(3)

O6 0.079(5) 0.026(3) 0.060(4) -0.005(3) -0.006(3) -0.007(3)

O7 0.092(6) 0.082(6) 0.052(5) -0.017(4) 0.011(4) -0.007(5)

O8 0.042(4) 0.057(4) 0.059(4) -0.021(3) -0.010(3) 0.001(3)

O9 0.052(4) 0.062(5) 0.048(4) -0.008(3) -0.008(3) -0.009(3)

O10 0.071(5) 0.109(7) 0.054(5) -0.023(4) 0.011(4) 0.021(5)

O11 0.034(3) 0.053(4) 0.066(4) -0.023(3) -0.018(3) 0.006(3)

Ho1 0.0287(2) 0.0283(2) 0.0431(2) -0.00784(15) -0.00892(14) 0.00345(14)

W1 0.02595(16) 0.02659(17) 0.03690(17) -0.00684(11) -0.00817(11) 0.00205(11)

 

_geom_special_details

;

 All esds (except the esd in the dihedral angle between two l.s. planes)

 are estimated using the full covariance matrix.  The cell esds are taken

 into account individually in the estimation of esds in distances, angles

 and torsion angles; correlations between esds in cell parameters are only

 used when they are defined by crystal symmetry.  An approximate (isotropic)

 treatment of cell esds is used for estimating esds involving l.s. planes.

;

 

loop_

 _geom_bond_atom_site_label_1

 _geom_bond_atom_site_label_2

 _geom_bond_distance

 _geom_bond_site_symmetry_2

 _geom_bond_publ_flag

C1 O1 1.451(12) . ?

C1 H1A 0.9600 . ?

C1 H1B 0.9600 . ?

C1 H1C 0.9600 . ?

C2 C3 1.383(12) . ?

C2 C7 1.385(13) . ?

C2 O1 1.396(9) . ?

C3 C4 1.402(14) . ?

C3 H3 0.9300 . ?

C4 C5 1.353(15) . ?

C4 H4 0.9300 . ?

C5 C6 1.413(13) . ?

C5 H5 0.9300 . ?

C6 C7 1.403(11) . ?

C6 C8 1.428(14) . ?

C7 O2 1.344(10) . ?

C8 N1 1.286(12) . ?

C8 H8 0.9300 . ?

C9 N1 1.460(12) . ?

C9 C10 1.516(15) . ?

C9 H9A 0.9700 . ?

C9 H9B 0.9700 . ?

C10 C11 1.497(13) . ?

C10 H10A 0.9700 . ?

C10 H10B 0.9700 . ?

C11 N2 1.488(11) . ?

C11 H11A 0.9700 . ?

C11 H11B 0.9700 . ?

C12 N2 1.283(11) . ?

C12 C13 1.453(12) . ?

C12 H12 0.9300 . ?

C13 C18 1.391(12) . ?

C13 C14 1.415(13) . ?

C14 C15 1.381(13) . ?

C14 H14 0.9300 . ?

C15 C16 1.381(14) . ?

C15 H15 0.9300 . ?

C16 C17 1.359(12) . ?

C16 H16 0.9300 . ?

C17 O4 1.393(10) . ?

C17 C18 1.413(11) . ?

C18 O3 1.330(9) . ?

C19 O4 1.444(10) . ?

C19 H19A 0.9600 . ?

C19 H19B 0.9600 . ?

C19 H19C 0.9600 . ?

C20 N5 1.364(11) . ?

C20 C21 1.377(11) . ?

C20 H20 0.9300 . ?

C21 C22 1.371(13) . ?

C21 H21 0.9300 . ?

C22 C23 1.376(13) . ?

C22 H22 0.9300 . ?

C23 C24 1.384(11) . ?

C23 H23 0.9300 . ?

C24 N5 1.346(9) . ?

C24 C25 1.468(12) . ?

C25 N6 1.365(9) . ?

C25 C26 1.385(10) . ?

C26 C27 1.386(14) . ?

C26 H26 0.9300 . ?

C27 C28 1.386(14) . ?

C27 H27 0.9300 . ?

C28 C29 1.360(12) . ?

C28 H28 0.9300 . ?

C29 N6 1.349(11) . ?

C29 H29 0.9300 . ?

C30 N7 1.143(11) . ?

C30 W1 2.179(9) . ?

C31 N8 1.162(10) . ?

C31 W1 2.138(8) . ?

C32 N9 1.148(11) . ?

C32 W1 2.144(9) . ?

C33 N10 1.133(12) . ?

C33 W1 2.147(9) . ?

C34 N11 1.141(12) . ?

C34 W1 2.163(9) . ?

C35 N12 1.147(12) . ?

C35 W1 2.159(8) . ?

C36 N13 1.153(19) . ?

C36 C37 1.50(2) . ?

C37 H37A 0.9600 . ?

C37 H37B 0.9600 . ?

C37 H37C 0.9600 . ?

C38 N14 1.12(3) . ?

C38 C39 1.46(3) . ?

C39 H39A 0.9600 . ?

C39 H39B 0.9600 . ?

C39 H39C 0.9600 . ?

C40 N15 1.10(2) . ?

C40 C41 1.41(2) . ?

C41 H41A 0.9600 . ?

C41 H41B 0.9600 . ?

C41 H41C 0.9600 . ?

Cu1 O2 1.949(6) . ?

Cu1 O3 1.954(5) . ?

Cu1 N1 1.967(7) . ?

Cu1 N2 1.979(8) . ?

Cu1 Ho1 3.4366(11) . ?

N3 O7 1.193(11) . ?

N3 O5 1.263(10) . ?

N3 O6 1.300(11) . ?

N3 Ho1 2.850(8) . ?

N4 O10 1.203(11) . ?

N4 O8 1.249(11) . ?

N4 O9 1.273(11) . ?

N4 Ho1 2.841(8) . ?

N5 W1 2.210(6) . ?

N6 W1 2.219(6) . ?

O1 Ho1 2.441(6) . ?

O2 Ho1 2.294(5) . ?

O3 Ho1 2.315(6) . ?

O4 Ho1 2.473(6) . ?

O5 Ho1 2.394(6) . ?

O6 Ho1 2.437(7) . ?

O8 Ho1 2.402(7) . ?

O9 Ho1 2.444(7) . ?

O11 Ho1 2.341(6) . ?

 

loop_

 _geom_angle_atom_site_label_1

 _geom_angle_atom_site_label_2

 _geom_angle_atom_site_label_3

 _geom_angle

 _geom_angle_site_symmetry_1

 _geom_angle_site_symmetry_3

 _geom_angle_publ_flag

O1 C1 H1A 109.5 . . ?

O1 C1 H1B 109.5 . . ?

H1A C1 H1B 109.5 . . ?

O1 C1 H1C 109.5 . . ?

H1A C1 H1C 109.5 . . ?

H1B C1 H1C 109.5 . . ?

C3 C2 C7 122.4(8) . . ?

C3 C2 O1 124.0(9) . . ?

C7 C2 O1 113.6(7) . . ?

C2 C3 C4 118.3(10) . . ?

C2 C3 H3 120.9 . . ?

C4 C3 H3 120.9 . . ?

C5 C4 C3 120.5(9) . . ?

C5 C4 H4 119.7 . . ?

C3 C4 H4 119.7 . . ?

C4 C5 C6 121.5(9) . . ?

C4 C5 H5 119.3 . . ?

C6 C5 H5 119.3 . . ?

C7 C6 C5 118.5(9) . . ?

C7 C6 C8 122.9(8) . . ?

C5 C6 C8 118.5(8) . . ?

O2 C7 C2 119.2(7) . . ?

O2 C7 C6 122.0(9) . . ?

C2 C7 C6 118.8(8) . . ?

N1 C8 C6 128.5(8) . . ?

N1 C8 H8 115.7 . . ?

C6 C8 H8 115.7 . . ?

N1 C9 C10 112.9(8) . . ?

N1 C9 H9A 109.0 . . ?

C10 C9 H9A 109.0 . . ?

N1 C9 H9B 109.0 . . ?

C10 C9 H9B 109.0 . . ?

H9A C9 H9B 107.8 . . ?

C11 C10 C9 112.1(8) . . ?

C11 C10 H10A 109.2 . . ?

C9 C10 H10A 109.2 . . ?

C11 C10 H10B 109.2 . . ?

C9 C10 H10B 109.2 . . ?

H10A C10 H10B 107.9 . . ?

N2 C11 C10 113.9(8) . . ?

N2 C11 H11A 108.8 . . ?

C10 C11 H11A 108.8 . . ?

N2 C11 H11B 108.8 . . ?

C10 C11 H11B 108.8 . . ?

H11A C11 H11B 107.7 . . ?

N2 C12 C13 127.7(9) . . ?

N2 C12 H12 116.1 . . ?

C13 C12 H12 116.1 . . ?

C18 C13 C14 120.4(8) . . ?

C18 C13 C12 123.4(8) . . ?

C14 C13 C12 116.0(8) . . ?

C15 C14 C13 118.7(9) . . ?

C15 C14 H14 120.6 . . ?

C13 C14 H14 120.6 . . ?

C14 C15 C16 121.0(9) . . ?

C14 C15 H15 119.5 . . ?

C16 C15 H15 119.5 . . ?

C17 C16 C15 120.5(9) . . ?

C17 C16 H16 119.8 . . ?

C15 C16 H16 119.8 . . ?

C16 C17 O4 125.7(7) . . ?

C16 C17 C18 120.8(8) . . ?

O4 C17 C18 113.5(7) . . ?

O3 C18 C13 123.5(7) . . ?

O3 C18 C17 118.0(7) . . ?

C13 C18 C17 118.5(7) . . ?

O4 C19 H19A 109.5 . . ?

O4 C19 H19B 109.5 . . ?

H19A C19 H19B 109.5 . . ?

O4 C19 H19C 109.5 . . ?

H19A C19 H19C 109.5 . . ?

H19B C19 H19C 109.5 . . ?

N5 C20 C21 121.7(8) . . ?

N5 C20 H20 119.2 . . ?

C21 C20 H20 119.2 . . ?

C22 C21 C20 119.8(9) . . ?

C22 C21 H21 120.1 . . ?

C20 C21 H21 120.1 . . ?

C21 C22 C23 119.3(8) . . ?

C21 C22 H22 120.3 . . ?

C23 C22 H22 120.3 . . ?

C22 C23 C24 118.8(8) . . ?

C22 C23 H23 120.6 . . ?

C24 C23 H23 120.6 . . ?

N5 C24 C23 122.8(8) . . ?

N5 C24 C25 114.1(7) . . ?

C23 C24 C25 123.1(7) . . ?

N6 C25 C26 120.1(8) . . ?

N6 C25 C24 116.9(6) . . ?

C26 C25 C24 122.9(7) . . ?

C25 C26 C27 120.9(8) . . ?

C25 C26 H26 119.6 . . ?

C27 C26 H26 119.6 . . ?

C28 C27 C26 117.5(7) . . ?

C28 C27 H27 121.3 . . ?

C26 C27 H27 121.3 . . ?

C29 C28 C27 120.3(9) . . ?

C29 C28 H28 119.8 . . ?

C27 C28 H28 119.8 . . ?

N6 C29 C28 122.4(8) . . ?

N6 C29 H29 118.8 . . ?

C28 C29 H29 118.8 . . ?

N7 C30 W1 176.5(8) . . ?

N8 C31 W1 179.6(9) . . ?

N9 C32 W1 179.7(10) . . ?

N10 C33 W1 177.6(10) . . ?

N11 C34 W1 176.3(8) . . ?

N12 C35 W1 175.0(8) . . ?

N13 C36 C37 178.3(18) . . ?

C36 C37 H37A 109.5 . . ?

C36 C37 H37B 109.5 . . ?

H37A C37 H37B 109.5 . . ?

C36 C37 H37C 109.5 . . ?

H37A C37 H37C 109.5 . . ?

H37B C37 H37C 109.5 . . ?

N14 C38 C39 180(3) . . ?

C38 C39 H39A 109.5 . . ?

C38 C39 H39B 109.5 . . ?

H39A C39 H39B 109.5 . . ?

C38 C39 H39C 109.5 . . ?

H39A C39 H39C 109.5 . . ?

H39B C39 H39C 109.5 . . ?

N15 C40 C41 175(3) . . ?

C40 C41 H41A 109.5 . . ?

C40 C41 H41B 109.5 . . ?

H41A C41 H41B 109.5 . . ?

C40 C41 H41C 109.5 . . ?

H41A C41 H41C 109.5 . . ?

H41B C41 H41C 109.5 . . ?

O2 Cu1 O3 78.4(2) . . ?

O2 Cu1 N1 91.1(3) . . ?

O3 Cu1 N1 169.4(3) . . ?

O2 Cu1 N2 159.1(3) . . ?

O3 Cu1 N2 92.4(3) . . ?

N1 Cu1 N2 97.7(3) . . ?

O2 Cu1 Ho1 39.44(15) . . ?

O3 Cu1 Ho1 40.12(18) . . ?

N1 Cu1 Ho1 129.4(2) . . ?

N2 Cu1 Ho1 132.1(2) . . ?

C8 N1 C9 117.4(7) . . ?

C8 N1 Cu1 125.3(6) . . ?

C9 N1 Cu1 117.3(6) . . ?

C12 N2 C11 113.9(8) . . ?

C12 N2 Cu1 124.0(6) . . ?

C11 N2 Cu1 122.0(6) . . ?

O7 N3 O5 122.9(9) . . ?

O7 N3 O6 122.6(9) . . ?

O5 N3 O6 114.5(7) . . ?

O7 N3 Ho1 172.5(7) . . ?

O5 N3 Ho1 56.4(4) . . ?

O6 N3 Ho1 58.5(4) . . ?

O10 N4 O8 123.7(10) . . ?

O10 N4 O9 120.1(10) . . ?

O8 N4 O9 116.1(8) . . ?

O10 N4 Ho1 175.2(8) . . ?

O8 N4 Ho1 57.0(5) . . ?

O9 N4 Ho1 59.1(4) . . ?

C24 N5 C20 117.6(7) . . ?

C24 N5 W1 119.0(5) . . ?

C20 N5 W1 123.3(5) . . ?

C29 N6 C25 118.9(7) . . ?

C29 N6 W1 124.5(5) . . ?

C25 N6 W1 116.5(5) . . ?

C2 O1 C1 116.7(7) . . ?

C2 O1 Ho1 117.5(5) . . ?

C1 O1 Ho1 125.3(5) . . ?

C7 O2 Cu1 129.8(5) . . ?

C7 O2 Ho1 121.9(5) . . ?

Cu1 O2 Ho1 107.9(2) . . ?

C18 O3 Cu1 127.6(5) . . ?

C18 O3 Ho1 122.5(5) . . ?

Cu1 O3 Ho1 106.9(2) . . ?

C17 O4 C19 117.1(7) . . ?

C17 O4 Ho1 116.7(4) . . ?

C19 O4 Ho1 125.1(6) . . ?

N3 O5 Ho1 97.6(5) . . ?

N3 O6 Ho1 94.5(5) . . ?

N4 O8 Ho1 97.1(5) . . ?

N4 O9 Ho1 94.4(6) . . ?

O2 Ho1 O3 64.7(2) . . ?

O2 Ho1 O11 139.5(2) . . ?

O3 Ho1 O11 148.6(2) . . ?

O2 Ho1 O5 74.8(2) . . ?

O3 Ho1 O5 104.9(2) . . ?

O11 Ho1 O5 73.3(2) . . ?

O2 Ho1 O8 122.5(2) . . ?

O3 Ho1 O8 118.3(2) . . ?

O11 Ho1 O8 70.0(2) . . ?

O5 Ho1 O8 136.8(2) . . ?

O2 Ho1 O6 105.1(2) . . ?

O3 Ho1 O6 80.1(2) . . ?

O11 Ho1 O6 74.1(3) . . ?

O5 Ho1 O6 53.0(2) . . ?

O8 Ho1 O6 132.3(2) . . ?

O2 Ho1 O1 66.5(2) . . ?

O3 Ho1 O1 129.5(2) . . ?

O11 Ho1 O1 81.0(2) . . ?

O5 Ho1 O1 73.8(2) . . ?

O8 Ho1 O1 78.4(2) . . ?

O6 Ho1 O1 125.5(2) . . ?

O2 Ho1 O9 79.0(2) . . ?

O3 Ho1 O9 74.8(2) . . ?

O11 Ho1 O9 122.3(2) . . ?

O5 Ho1 O9 150.7(2) . . ?

O8 Ho1 O9 52.4(2) . . ?

O6 Ho1 O9 149.8(2) . . ?

O1 Ho1 O9 83.9(2) . . ?

O2 Ho1 O4 128.8(2) . . ?

O3 Ho1 O4 65.50(19) . . ?

O11 Ho1 O4 91.1(2) . . ?

O5 Ho1 O4 129.8(2) . . ?

O8 Ho1 O4 73.4(2) . . ?

O6 Ho1 O4 77.0(2) . . ?

O1 Ho1 O4 151.8(2) . . ?

O9 Ho1 O4 77.6(2) . . ?

O2 Ho1 N4 101.9(2) . . ?

O3 Ho1 N4 96.7(3) . . ?

O11 Ho1 N4 95.9(3) . . ?

O5 Ho1 N4 153.7(3) . . ?

O8 Ho1 N4 25.9(2) . . ?

O6 Ho1 N4 148.2(2) . . ?

O1 Ho1 N4 80.9(2) . . ?

O9 Ho1 N4 26.5(2) . . ?

O4 Ho1 N4 73.0(2) . . ?

O2 Ho1 N3 91.2(2) . . ?

O3 Ho1 N3 94.7(2) . . ?

O11 Ho1 N3 69.8(2) . . ?

O5 Ho1 N3 26.1(2) . . ?

O8 Ho1 N3 139.7(2) . . ?

O6 Ho1 N3 27.0(2) . . ?

O1 Ho1 N3 98.8(2) . . ?

O9 Ho1 N3 167.9(2) . . ?

O4 Ho1 N3 103.7(2) . . ?

N4 Ho1 N3 165.4(3) . . ?

O2 Ho1 Cu1 32.67(15) . . ?

O3 Ho1 Cu1 32.95(12) . . ?

O11 Ho1 Cu1 157.17(16) . . ?

O5 Ho1 Cu1 84.73(16) . . ?

O8 Ho1 Cu1 132.58(17) . . ?

O6 Ho1 Cu1 87.82(19) . . ?

O1 Ho1 Cu1 99.17(14) . . ?

O9 Ho1 Cu1 80.19(17) . . ?

O4 Ho1 Cu1 98.44(14) . . ?

N4 Ho1 Cu1 106.7(2) . . ?

N3 Ho1 Cu1 87.73(16) . . ?

C31 W1 C32 71.8(3) . . ?

C31 W1 C33 70.3(3) . . ?

C32 W1 C33 101.2(4) . . ?

C31 W1 C35 75.0(3) . . ?

C32 W1 C35 142.8(3) . . ?

C33 W1 C35 82.5(4) . . ?

C31 W1 C34 121.3(3) . . ?

C32 W1 C34 72.1(3) . . ?

C33 W1 C34 73.4(4) . . ?

C35 W1 C34 142.0(3) . . ?

C31 W1 C30 70.7(3) . . ?

C32 W1 C30 80.9(3) . . ?

C33 W1 C30 137.9(3) . . ?

C35 W1 C30 72.7(3) . . ?

C34 W1 C30 143.1(3) . . ?

C31 W1 N5 142.3(3) . . ?

C32 W1 N5 84.3(3) . . ?

C33 W1 N5 144.9(3) . . ?

C35 W1 N5 113.7(3) . . ?

C34 W1 N5 75.6(3) . . ?

C30 W1 N5 77.1(3) . . ?

C31 W1 N6 140.4(3) . . ?

C32 W1 N6 144.4(3) . . ?

C33 W1 N6 83.6(3) . . ?

C35 W1 N6 72.6(3) . . ?

C34 W1 N6 75.8(3) . . ?

C30 W1 N6 118.9(3) . . ?

N5 W1 N6 73.2(2) . . ?

 

_diffrn_measured_fraction_theta_max    0.896

_diffrn_reflns_theta_full              29.31

_diffrn_measured_fraction_theta_full   0.896

_refine_diff_density_max    4.025

_refine_diff_density_min   -2.227

_refine_diff_density_rms    0.171
